# Supplementary material for: High-throughput prediction of protein conformational distributions with subsampled AlphaFold2
Source: PubMed Central journal article supplement (PMC10973385; doi:10.1038/s41467-024-46715-9), 2024-03-27
Supplement: 41467_2024_46715_MOESM1_ESM.pdf [file 41467_2024_46715_MOESM1_ESM.pdf]

1 Supplementary Materials for “High-Throughput Prediction  
2 of Protein Conformational Distributions with Subsampled  
3 AlphaFold2”

4 **Gabriel Monteiro da Silva and Jennifer Y. Cui**

*Brown University Department of Molecular Biology, Cell Biology,  
and Biochemistry, Providence, RI, USA*

**David C. Dalgarno**

*Dalgarno Scientific LLC, Brookline, MA, USA*

**George P. Lisi and Brenda M. Rubenstein\***

*Brown University Department of Molecular Biology, Cell Biology,  
and Biochemistry*

*Brown University Department of Chemistry  
Providence, RI, USA*

5 April 1, 2024

6 **AlphaFold 2 Subsampling and Abl1 Kinase Ensemble Predictions**

7 The accuracy of our ensemble predictions was defined as their capacity to replicate the wild-type Abl1  
8 kinase core conformations and their correct relative populations as validated by nuclear magnetic res-  
9 onance experiments. Specifically, we sought a combination of parameters that led to an ensemble of  
10 predictions that met the following criteria: the ground state is the most frequent prediction within the  
11 ensemble, the transition from the ground to I2 state is captured within the ensemble, and the I2 state  
12 is present in the ensemble more frequently than transition states. Importantly, we opted to examine the  
13 relative populations of the ground and I2 states because of the large backbone rearrangement involved  
14 in the transition between these conformations, which is more likely to be reproduced by AF2 than the  
15 comparatively small dihedral flips in the ground to I1 transition. We optimized the accuracy achieved as  
16 a function of the following parameters: *max\_seq*, *extra\_seq*, number of seeds, and number of recycles  
17 (see Supplementary Table 1 for a complete list of tests and parameters). We evaluated the ensemble  
18 resulting from each parameter set by measuring the activation loop backbone RMSD relative to either  
19 the active kinase core (PDB 6XR6) [1] or the I2 kinase core (PDB 6XRG) [1] for each prediction. This  
20 decision is rooted in the fact that the activation loop is the structural element that changes the most (in  
21 terms of backbone motions) upon the transition from the ground to I2 state [1].

22 To encourage AF2 to generate a full ensemble of Abl1 conformations, we started by compiling an  
23 extensive MSA spanning over 600,000 sequences using the JackHMMR algorithm [2] on wild-type Abl1  
24 kinase core (residues 229-515) sequences pulled from the UniRef90 [3], Small BFD [4], and MGnify [5]  
25 databases. To increase the statistical power of our results, we then ran 32 predictions with independent  
26 seeds for each test, and enabled dropouts during inference to sample from the uncertainty of the models.  
27 All other parameters were left in their default settings (3 recycles per prediction, 5 models per seed, a  
28 total of 160 predictions per run, 3 independent runs with unique seeds, 480 predictions per test).

29 In order to better quantify the effects of each parameter change, we binned each predicted struc-  
30 ture into three classes based on the backbone RMSD of relevant structural elements (activation loop,  
31 phosphate-binding loop, and C helix) with respect to the backbone of these elements in the ground (ac-  
32 tive) state, as defined by the lowest-energy structure assignment in the NMR ensemble PDB 6XR6 [1].  
33 Since the RMSD with respect to the ground state of the majority of predictions clustered within 3 Å, we  
34 classified predictions with RMSD values greater than 3.5 Å as “not in the ground state.” See Supplemen-  
35 tary Figure 1 for a depiction of the rationale behind this classification.

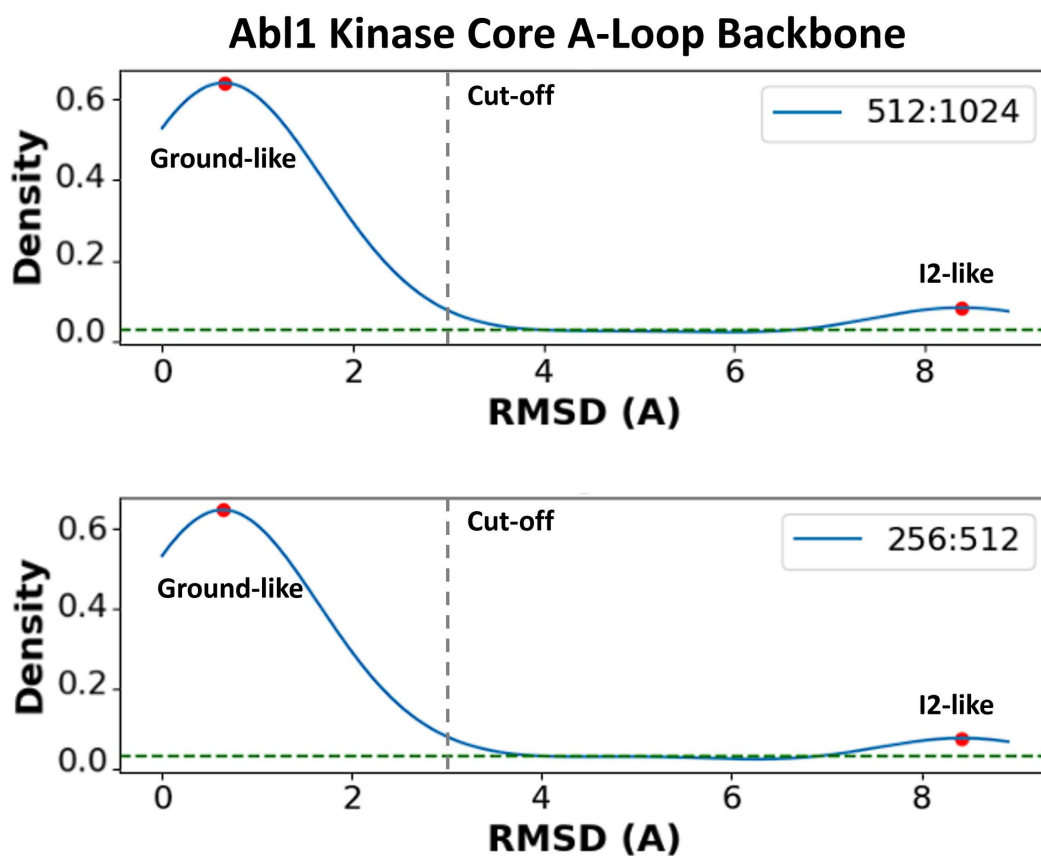

**Supplementary Figure 1:** of A-Loop (residues 379 to 395) backbone RMSD vs. the ground state reference (PDB 6XR6) for the predicted Abl1 kinase ensemble generated by AF2 with subsampling conditions (top) 512:1024 and (bottom) 256:512. Frequencies are calculated from a kernel density estimation with 480 samples per ensemble (96 independent seeds \* 5 different models).

36 Through this binning, we observed that the 256:512 and 512:1024 values for *max\_seq* and *extra\_seq*  
37 led to predictions in which the ground state is populated 80% and 85% of the time, respectively. Of note,  
38 NMR results suggest that the relative state population of the Abl1 kinase core’s ground state in solution

39 is 88%, which is in surprisingly good agreement with our AF2 predictions [1]. In contrast with the  
 40 effects observed from changing MSA composition and length, increasing the number of seeds beyond  
 41 128 did not lead to significant changes in the state distribution, suggesting a degree of determinism in  
 42 the prediction results, presumably stemming from AF2 training biases and information encoded in the  
 43 co-evolutionary signal (see Supplementary Figure 2).

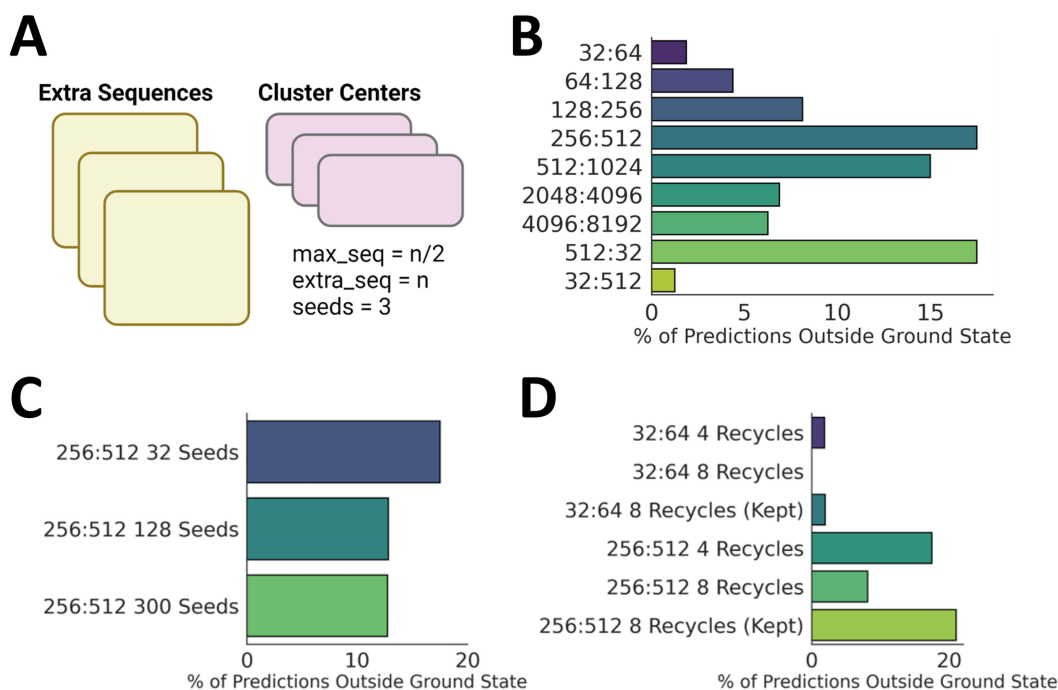

**Supplementary Figure 2:** Percent of Abl1 kinase domain conformations predicted to fall outside of the ground state using AF2 based on different MSA clustering parameters (number of sequences selected as cluster centers, number of sequences sampled from the clusters, number of seeds used in the prediction, and number of recycles). (A) Summary of the MSA subsampling and clustering algorithm implemented in AF2. (B) Percent of Abl1 kinase core conformations predicted to fall outside of the ground state using subsampled AF2 based upon the number of seeds used and the amount of recycling performed, and whether recycling intermediates are kept. (C) Impact of changing the number of seeds (each seed corresponds to an independent AF2 prediction); and (D) impact of changing the number of recycles and if structures from recycled iterations are included in the analysis or discarded. Each bar represents one data point (each data point is calculated from analyzing 160 measurements).

44 Interestingly, predictions with the *max\_seq* and *extra\_seq* parameters of 512 and 8, respectively, led  
 45 to results that are similar to those of the 512:1024 test. Similarly, changing *max\_seq* and *extra\_seq*  
 46 to 8:1024 led to results that closely resemble those from the 8:16 test. These results suggest that the  
 47 *max\_seq* parameter is the principal driver of alternative state predictions. This is unsurprising consider-  
 48 ing the different roles played by each parameter: the MSA of length defined by the *max\_seq* argument  
 49 and formed by the sequences randomly selected as cluster centers is passed to the expensive row/column  
 50 attention Evoformer track, while the MSA of length *extra\_seq* skips it. Due to the increased computa-  
 51 tional effort needed for featurization and attention, we expect AF2 to distill significantly more coevolu-  
 52 tionary signal from the MSA of length *max\_seq*, thus changes to *max\_seq* will exert greater influence  
 53 than changes than changes to *extra\_seq*.

54 Finally, we also tested the hypothesis that changing the number of recycles ( $n_{recycles}$ ) per seed  
55 could lead to changes in predicted state distributions by doubling the number of recycles. Interestingly,  
56 increasing the number of recycles significantly increases the population of the ground state, suggesting  
57 that the recycling stage plays a role in AF2’s propensity to generate different conformations. Consider-  
58 ing all of the above, we defined our target-specific parameters for all subsequent kinase predictions as  
59 follows:  $max\_seq$ : 256,  $extra\_seq$ : 512,  $n_{recycles}$ : 3,  $n_{models}$ : 5,  $n_{seeds}$ : 96. Considering its signif-  
60 icant impact on the distribution of predictions, the optimization of the  $max\_seq$  parameter is paramount  
61 for successfully obtaining conformational ensembles when running AF2. While 256 cluster centers (de-  
62 fined by  $max\_seq = 256$ ) works for Abl1, significantly smaller values are likely to be required for protein  
63 systems with less available sequence data.

## 64 Molecular Dynamics and WESTPA2 Simulations

65 Molecular dynamics simulations of wild-type Abl1 were conducted using the OpenMM software pack-  
66 age [6] with the amber99sb-ildn force field [7] and the tip3p water model [8] at 300 K and 1 atm. The  
67 lowest energy Abl1 structure from the PDB 6XR6 [1] NMR ensemble was solvated within a dodeca-  
68 hedron box and charges were neutralized by replacing a number of solvent atoms with chloride and  
69 potassium ions. Following solvation, we minimized the energy of each system using a steepest-descent  
70 algorithm until the maximum force on any given atom was less than 1000 kJ/mol/min or until 50,000  
71 minimization steps were conducted. We ran the simulations with a 1 fs time step during the equilibration  
72 phase and a 2 fs time step during the production phase. We equilibrated solvent atoms first for 1 ns  
73 in the NVT ensemble and then for 1 ns in the NPT ensemble with solute heavy atoms restrained using  
74 the LINCS algorithm with a spring constant of 1,000 kJ/mol/m<sup>2</sup> [9]. The production phase (in the NPT  
75 ensemble) followed the equilibration phase but without restraints.

76 We used the WESTPA2 [10] enhanced-sampling method to access the timescales necessary to simu-  
77 late the inactivation pathway of Abl1. This was done via two WESTPA2 simulations (ground to I1 and  
78 I1 to I2). As progress coordinates for the ground to I1 transition, we defined the distance between the  
79 backbone oxygen of V299 and the center of mass of the carboxyl group of D381 as PC1; and the angle  
80 formed by the center of mass of the carboxyl group of D381, the backbone oxygen of K379, and the  
81 center of mass of the aromatic ring of F382 as PC2. For the I1 to I2 transition, we defined the distance  
82 between the backbone oxygen of L409 and the backbone oxygen of E377 as PC1; and the distance be-  
83 tween backbone oxygen of L409 and the backbone oxygen of G4598 as PC2. Representative illustrations  
84 of the progress coordinates used in this protocol are in Supplementary Figure 3, and their distributions  
85 and start/end state definitions are described in Supplementary Figure 4. We ran WESTPA2 for 300 iter-  
86 ations for each leg of the transition, with the number of walkers per iteration varying from 64 to 512 due  
87 to the adaptive binning scheme, and 100 ps per iteration, totaling over 9 us of aggregate simulation time  
88 for each leg of the transition.

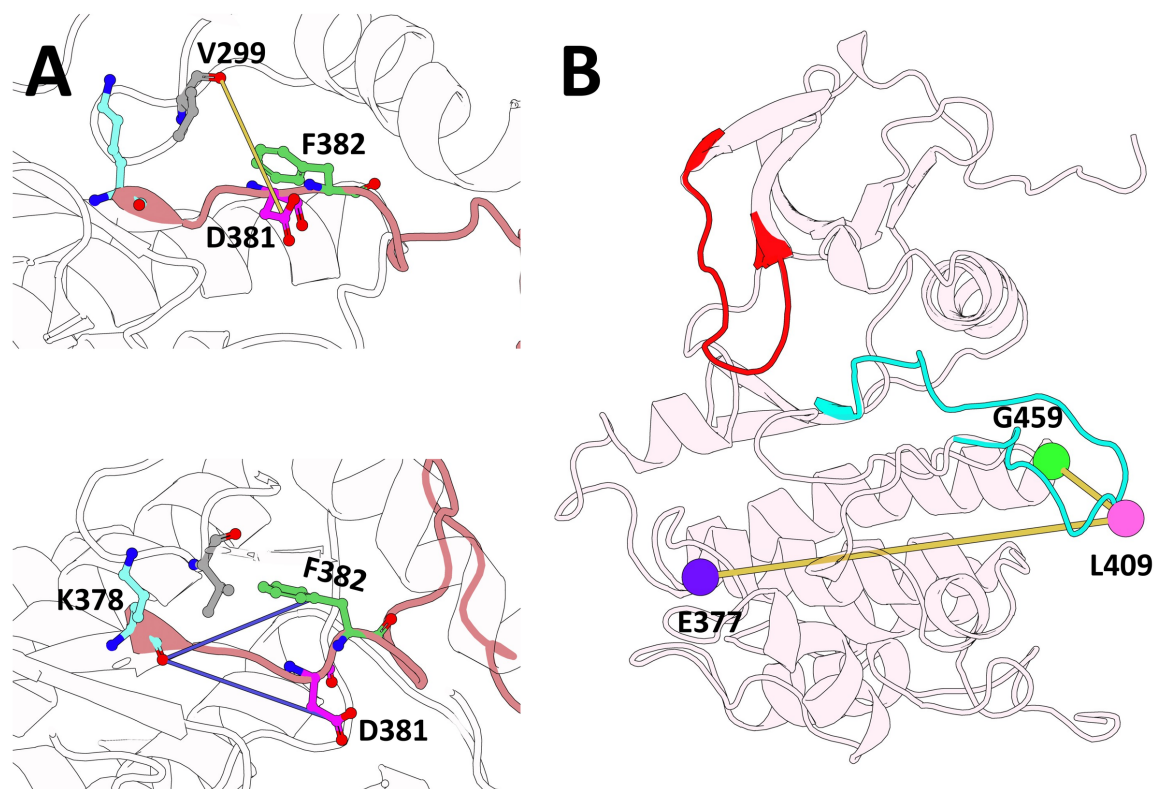

**Supplementary Figure 3:** Progress coordinates used in the WESTPA2 simulations of wild-type Abl1. (A) Progress coordinates used in sampling the transition from the ground to the I1 state. (B) Progress coordinates used in sampling the transition from the I1 to the I2 state.

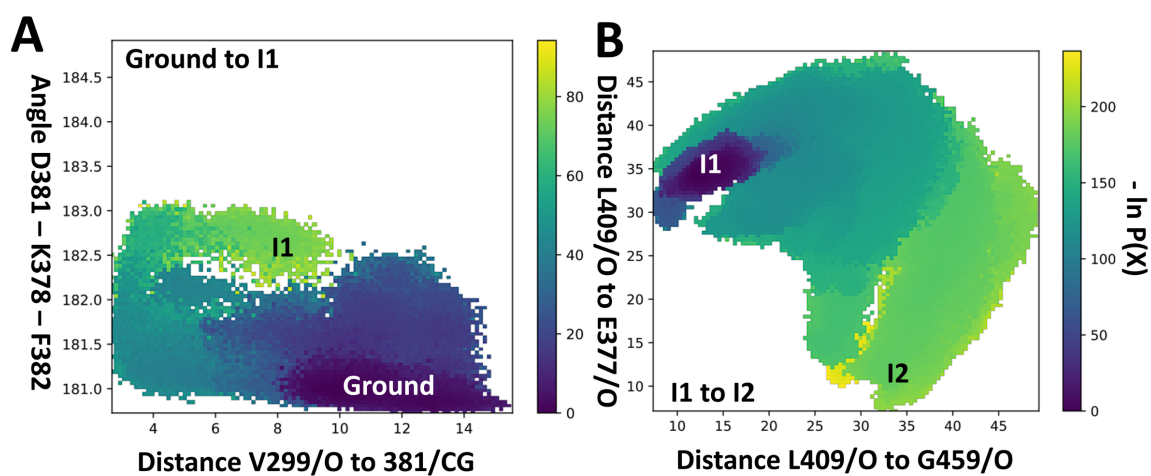

**Supplementary Figure 4:** Distribution of values for the progress coordinates used in either the transition from the (A) ground to the I1 state or (B) I1 to I2 state.

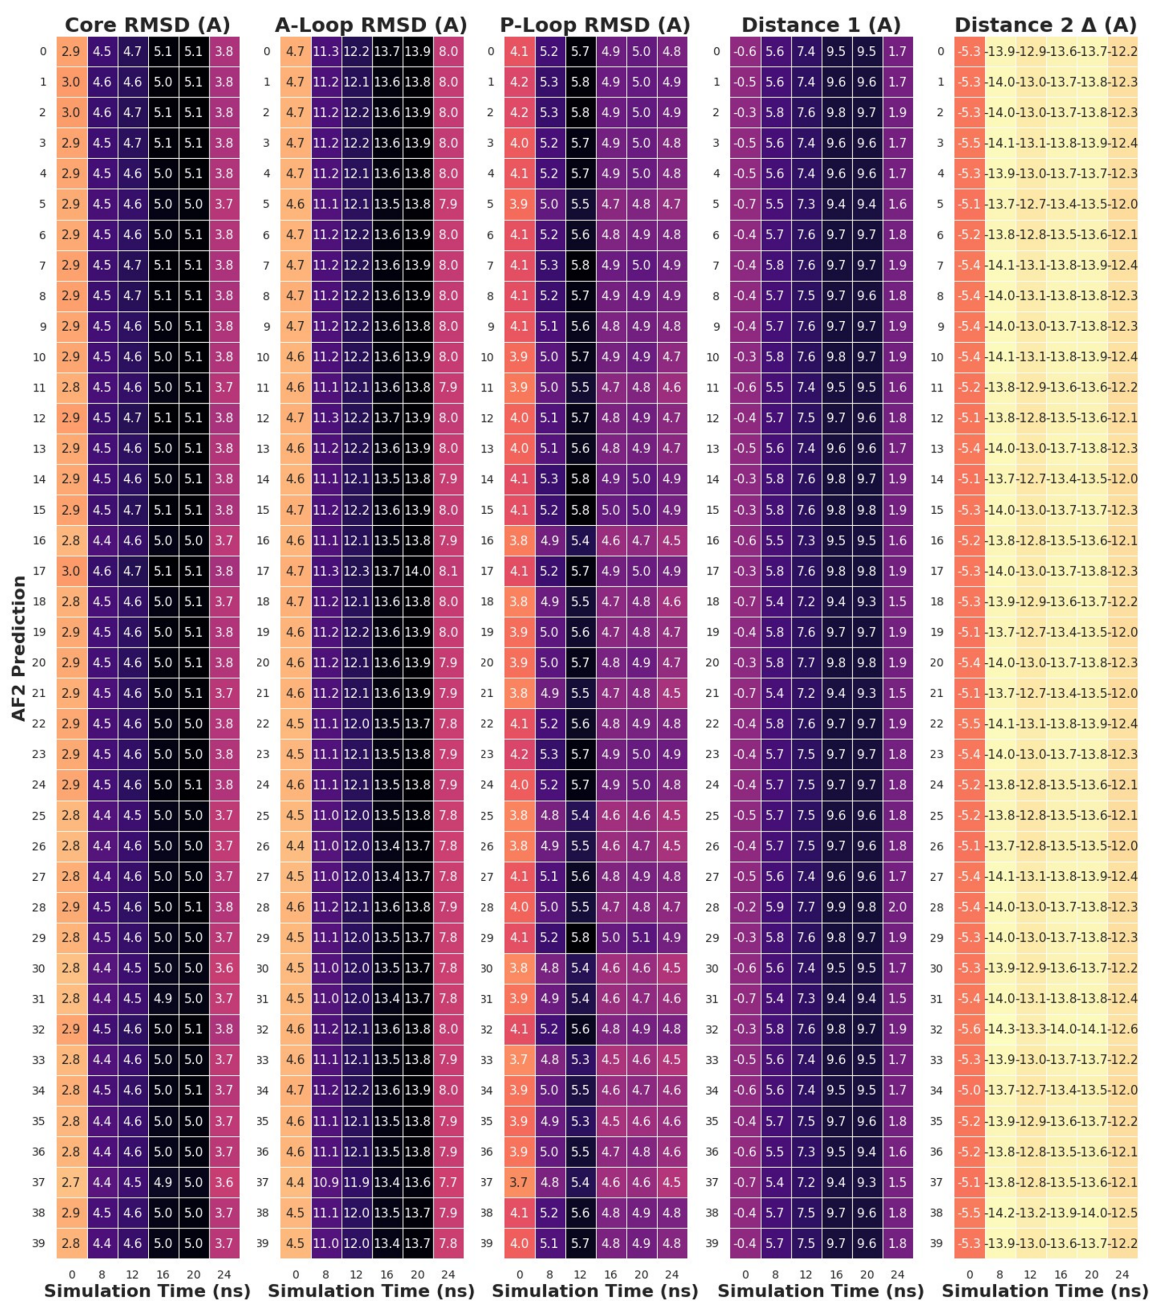

**Supplementary Figure 5:** Part one of four of the comparison between the values of five structural elements in the AbI1 kinase core known to change during the I1 to I2 transition as measured from the ensemble of 160 subsampled AF2 predictions and six frames extracted from a molecular dynamics simulation trajectory spanning the transition at different time points. Core, P-Loop, and A-Loop RMSDs are defined as the backbone RMSDs of each AF2 prediction’s kinase core (residues 242 to 459), activation loop (residues 379 to 395), or phosphate-binding loop (residues 244 to 256) vs. the kinase core, phosphate-binding loop, or activation loop backbone of the MD snapshot selected at each time point. Distance deltas are defined as the difference in atom pair distances between each AF2 prediction and its respective MD snapshot. Distance 1 corresponds to the distance between the backbone oxygens of E377 and L409, and Distance 2 corresponds to the distance between the backbone oxygens of L409 and G457.

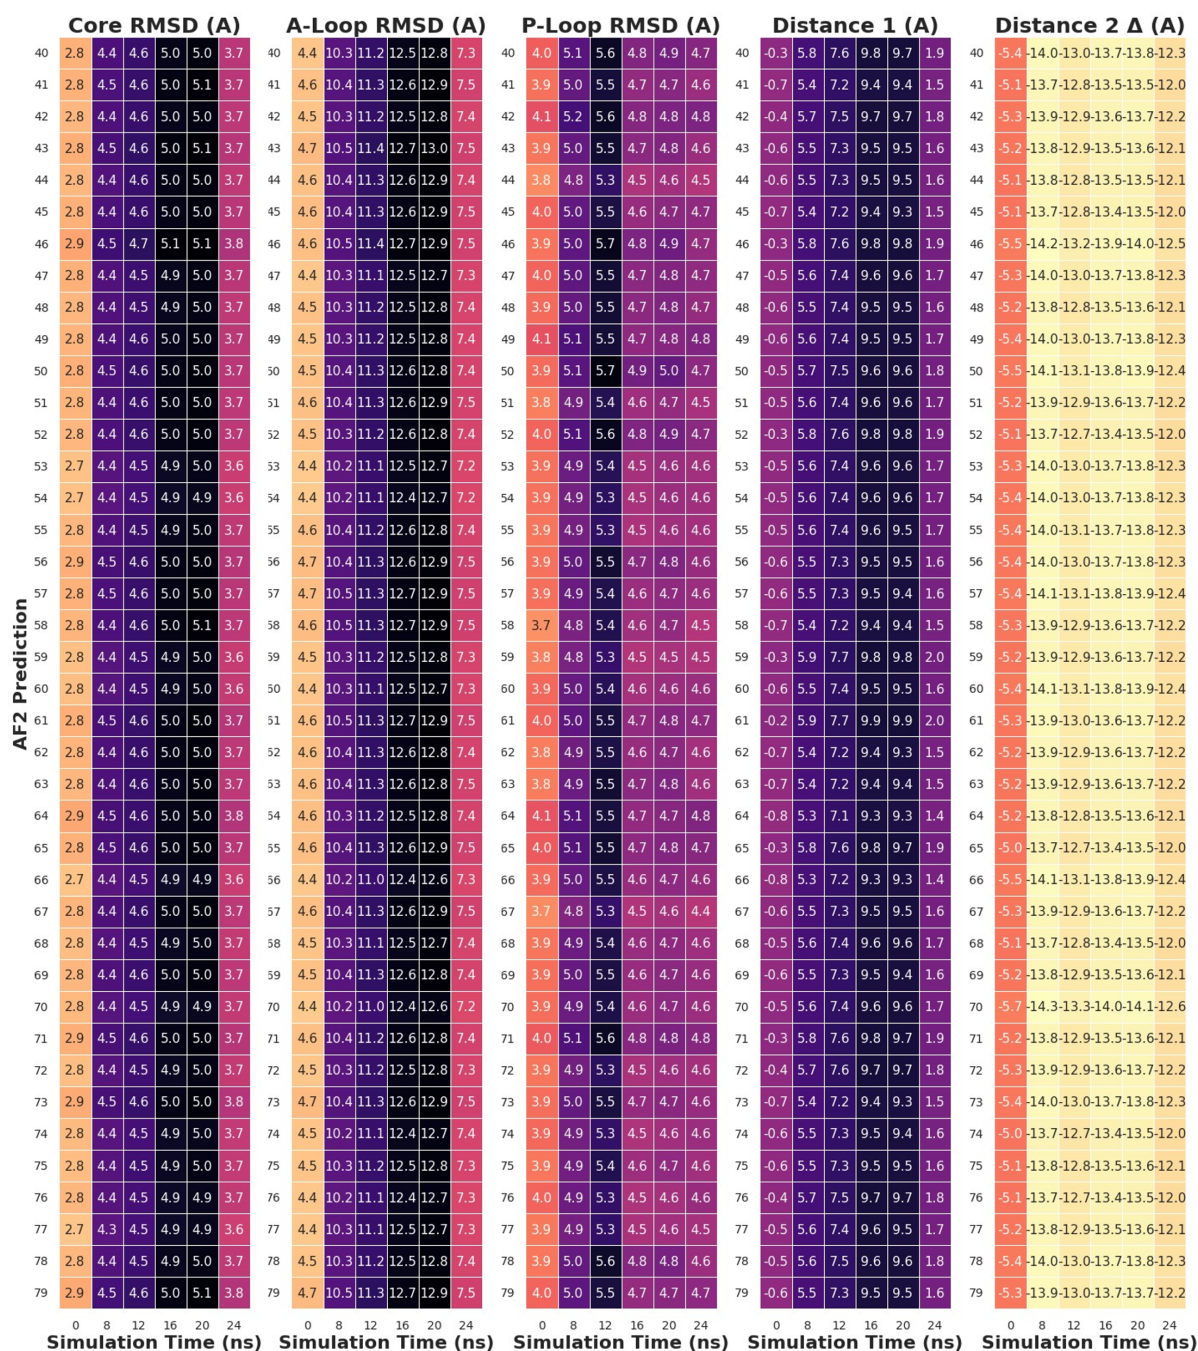

**Supplementary Figure 6:** Part two of four of the comparison between the values of five structural elements in the Abl1 kinase core known to change during the I1 to I2 transition as measured from the ensemble of 160 subsampled AF2 predictions and six frames extracted from a molecular dynamics simulation trajectory spanning the transition at different time points. Core, P-Loop, and A-Loop RMSDs are defined as the backbone RMSDs of each AF2 prediction’s kinase core (residues 242 to 459), activation loop (residues 379 to 395), or phosphate-binding loop (residues 244 to 256) vs. the kinase core, phosphate-binding loop, or activation loop backbone of the MD snapshot selected at each time point. Distance deltas are defined as the difference in atom pair distances between each AF2 prediction and its respective MD snapshot. Distance 1 corresponds to the distance between the backbone oxygens of E377 and L409, and Distance 2 corresponds to the distance between the backbone oxygens of L409 and G457.

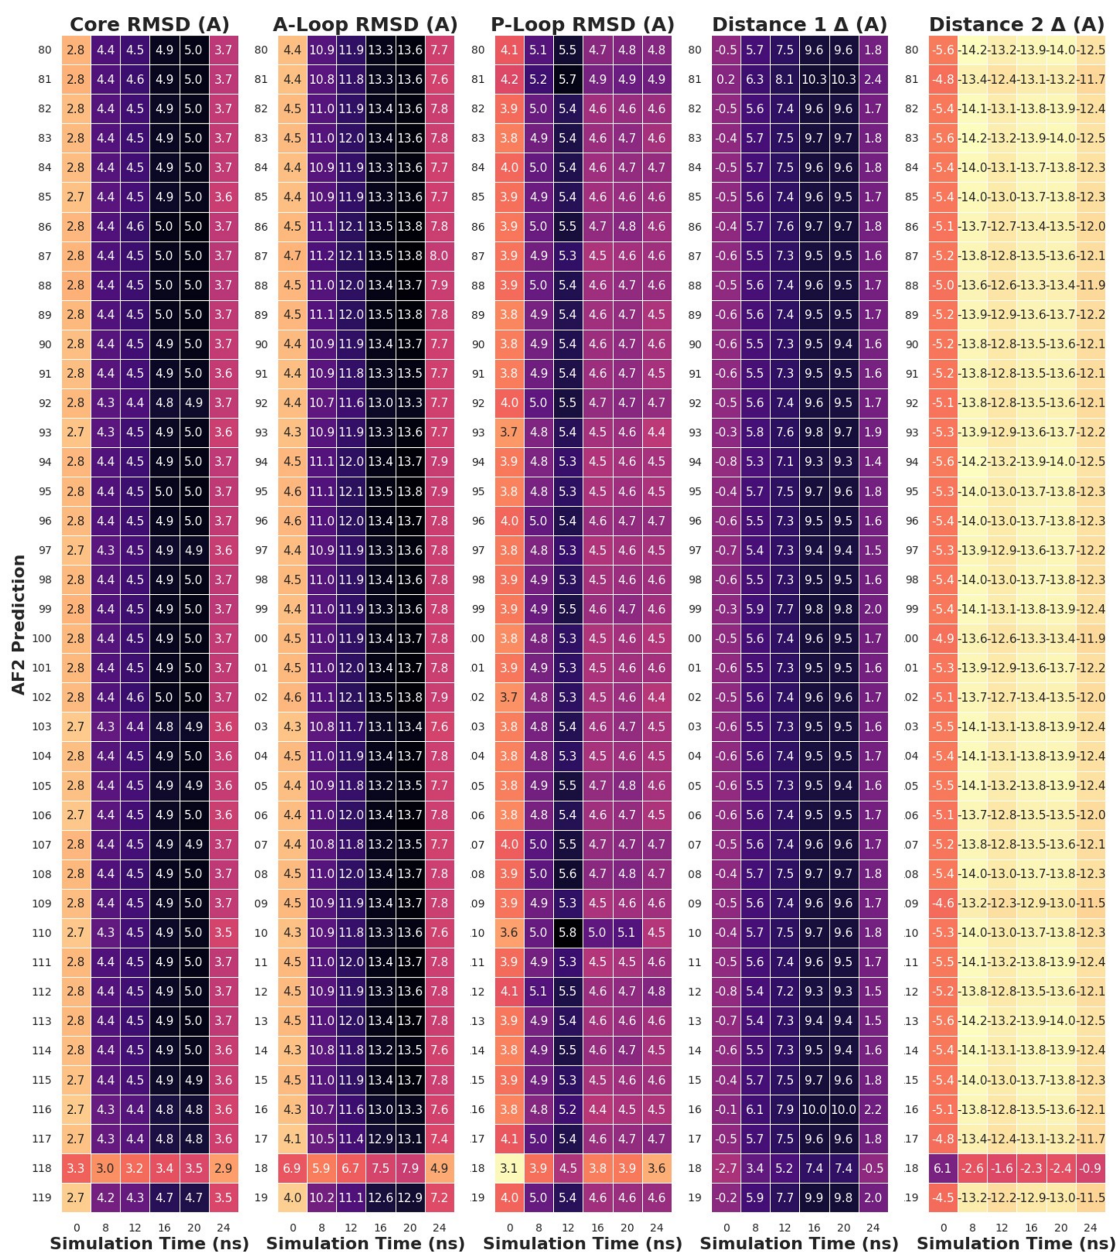

**Supplementary Figure 7:** Part three of four of the comparison between the values of five structural elements in the AbI1 kinase core known to change during the I1 to I2 transition as measured from the ensemble of 160 subsampled AF2 predictions and six frames extracted from a molecular dynamics simulation trajectory spanning the transition at different time points. Core, P-Loop, and A-Loop RMSDs are defined as the backbone RMSDs of each AF2 prediction’s kinase core (residues 242 to 459), activation loop (residues 379 to 395), or phosphate-binding loop (residues 244 to 256) vs. the kinase core, phosphate-binding loop, or activation loop backbone of the MD snapshot selected at each time point. Distance deltas are defined as the difference in atom pair distances between each AF2 prediction and its respective MD snapshot. Distance 1 corresponds to the distance between the backbone oxygens of E377 and L409, and Distance 2 corresponds to the distance between the backbone oxygens of L409 and G457.



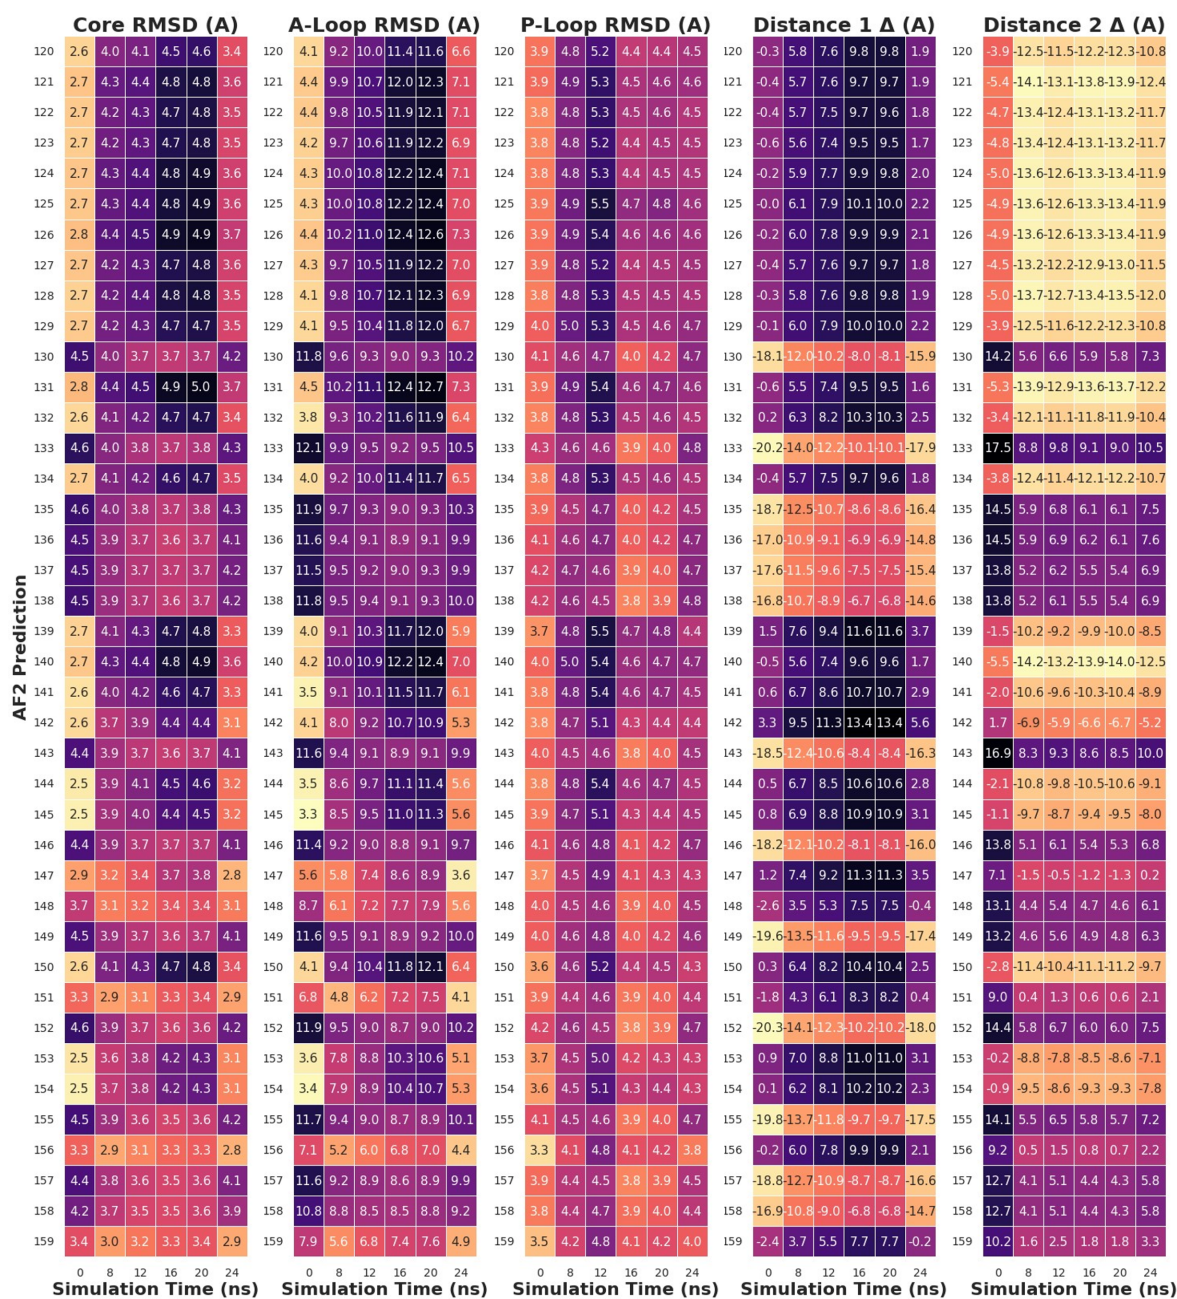

**Supplementary Figure 8:** Part four of four of the comparison between the values of five structural elements in the AbI1 kinase core known to change during the I1 to I2 transition as measured from the ensemble of 160 subsampled AF2 predictions and six frames extracted from a molecular dynamics simulation trajectory spanning the transition at different time points. Core, P-Loop, and A-Loop RMSDs are defined as the backbone RMSDs of each AF2 prediction’s kinase core (residues 242 to 459), activation loop (residues 379 to 395), or phosphate-binding loop (residues 244 to 256) vs. the kinase core, phosphate-binding loop, or activation loop backbone of the MD snapshot selected at each time point. Distance deltas are defined as the difference in atom pair distances between each AF2 prediction and its respective MD snapshot. Distance 1 corresponds to the distance between the backbone oxygens of E377 and L409, and Distance 2 corresponds to the distance between the backbone oxygens of L409 and G457.

89 **Abl1 Homolog Sequences Used to Generate Multiple Sequence Align-**  
 90 **ments**

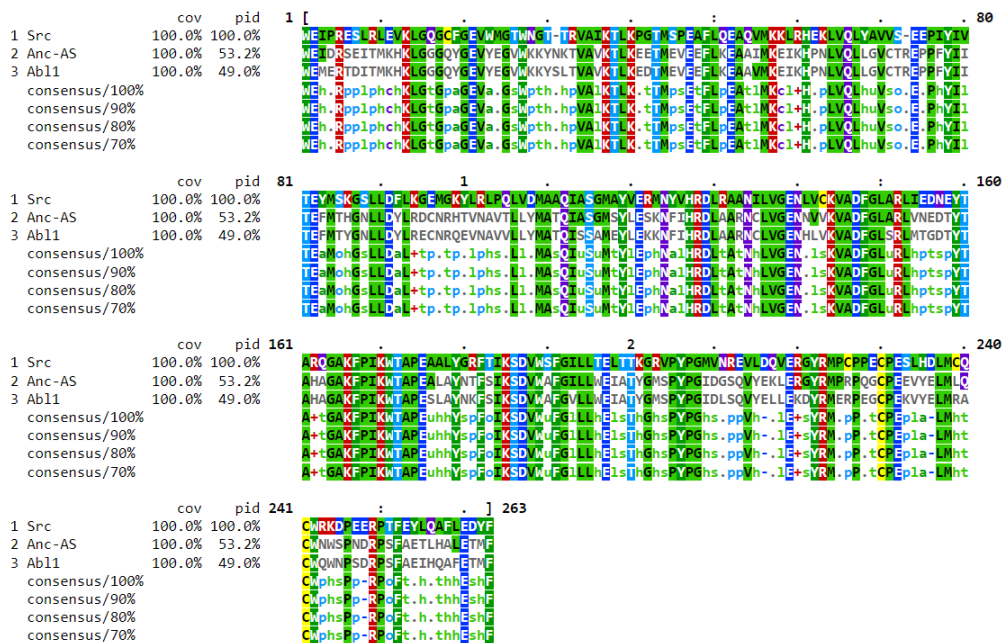

**Supplementary Figure 9:** Sequences of the Abl1, Src, and Anc-AS kinase cores used to generate MSAs as input for subsampled AlphaFold 2.

## 91 Optimization of AF2 Parameters for the Abl1 Protein

**Supplementary Table 1:** Optimized AF2 parameters for predicting Abl1 ensembles.

| <b>parameter_test</b> | <b>max_seq</b> | <b>extra_seq</b> | <b>n_recycles</b> | <b>n_models</b> | <b>n_seeds</b> | <b>%_notground</b> |
|-----------------------|----------------|------------------|-------------------|-----------------|----------------|--------------------|
| <b>t_max_extra_1</b>  | 32             | 64               | 3                 | 5               | 32             | 2                  |
| <b>t_max_extra_2</b>  | 64             | 128              | 3                 | 5               | 32             | 5                  |
| <b>t_max_extra_3</b>  | 128            | 256              | 3                 | 5               | 32             | 9                  |
| <b>t_max_extra_4</b>  | 256            | 512              | 3                 | 5               | 32             | 18                 |
| <b>t_max_extra_5</b>  | 512            | 1024             | 3                 | 5               | 32             | 15                 |
| <b>t_max_extra_6</b>  | 2048           | 4096             | 3                 | 5               | 32             | 7                  |
| <b>t_max_extra_7</b>  | 4098           | 8192             | 3                 | 5               | 32             | 6                  |
| <b>t_max_extra_8</b>  | 512            | 32               | 3                 | 5               | 32             | 18                 |
| <b>t_max_extra_9</b>  | 32             | 512              | 3                 | 5               | 32             | 1                  |
| <b>t_nseeds_1</b>     | 256            | 512              | 3                 | 5               | 128            | 12                 |
| <b>t_nseeds_2</b>     | 256            | 512              | 3                 | 5               | 300            | 12                 |
| <b>t_nrecycles_1</b>  | 32             | 64               | 8                 | 5               | 128            | 0                  |
| <b>t_nrecycles_2</b>  | 32             | 64               | 8 (kept)          | 5               | 128            | 2                  |
| <b>t_nrecycles_3</b>  | 256            | 512              | 8                 | 5               | 128            | 8                  |
| <b>t_nrecycles_4</b>  | 256            | 512              | 8 (kept)          | 5               | 128            | 21                 |

## 92 AF2 Predictions of the Relative State Populations of Abl1 Kinase 93 Core Mutants

**Supplementary Table 2:** Abl1 kinase core mutants and their observed or expected effects on the relative populations of the active (Ground), inactive 1 (I1), or inactive 2 (I2) states.

|                               | <b>Ground</b> | <b>I1</b> | <b>I2</b> |
|-------------------------------|---------------|-----------|-----------|
| <b>Wild-Type</b>              | 88            | 6         | 6         |
| <b>M290L</b>                  | 55            | 10        | 35        |
| <b>L301I</b>                  | 25            | 10        | 65        |
| <b>M290L + L301I</b>          | 8             | 10        | 82        |
| <b>F382L</b>                  | 90            | 0         | 10        |
| <b>F382Y</b>                  | 10            | 0         | 90        |
| <b>F382V</b>                  | 5             | 0         | 95        |
| <b>I2M</b>                    | 10            | 0         | 90        |
| <b>E255V (I2M background)</b> | nr            | nr        | 45        |
| <b>T315I (I2M background)</b> | 93            | 0         | 7         |
| <b>E255V + T315i</b>          | nr            | nr        | nr        |

## 94 **Effects of Model Choice**

95 In its current implementation, AF2 ships with five pre-trained models, which were trained for and applied  
96 in the CASP14 challenge [11, 12]. The differences between each model are slight, as they are all forked  
97 from the initial AF2 models. Namely, models (1, 2) were finely tuned with four templates, and models  
98 (3, 4, 5) did not use templates in their fine-tuning. Besides the use of templates, the models mostly  
99 diverge in the number of training times and the subsampling level used for training. Key differences  
100 among models are described in Supplementary Table 3.

**Supplementary Table 3:** Summary of differences among the five models shipped with AlphaFold2

| Model            | 1        | 2        | 3        | 4        | 5        |
|------------------|----------|----------|----------|----------|----------|
| Init. From       | N/A      | 1        | N/A      | 3        | 3        |
| N Templates      | 4        | 4        | 0        | 0        | 0        |
| Max Nres         | 384      | 256      | 256      | 256      | 256      |
| max_seq          | 512      | 512      | 512      | 512      | 512      |
| extra_seq        | 5120     | 1024     | 5120     | 5120     | 1024     |
| Training Samples | 0.3*10e6 | 0.6*10e6 | 1.4*10e6 | 1.1*10e6 | 2.4*10e6 |
| Training Time    | 20h      | 1d 13h   | 4d 1h    | 3d       | 5d 12h   |

101 To measure how each individual model fares at predicting the relative state populations of Abl1 and  
102 its activating and inactivating mutants, we divided Figure 6 into five plots, one for each model, and  
103 analyzed the accuracy (Supplementary Figure 10).

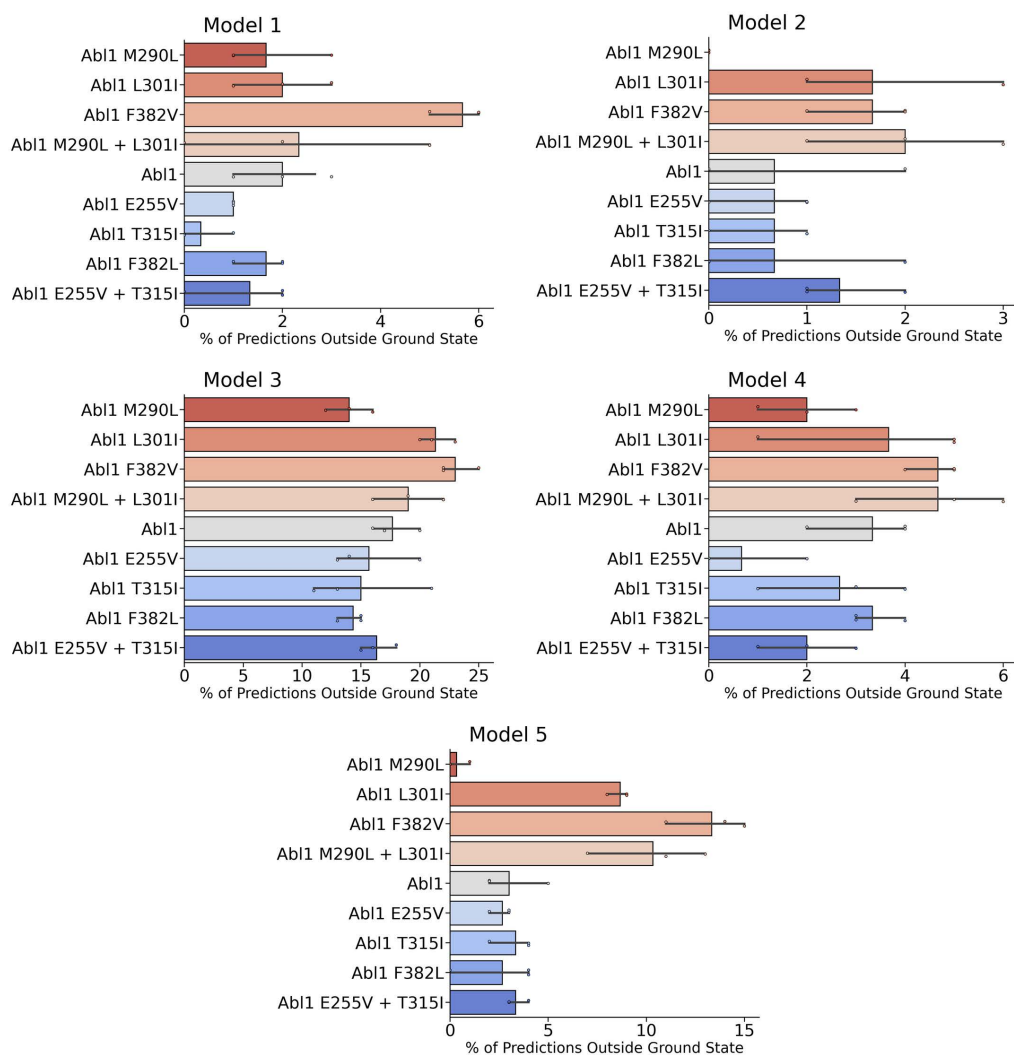

**Supplementary Figure 10:** Effects of model choice on predictions of the Abl1 activating and inactivating mutations. Each plot represents results from 96 independent seeds (32 seeds per replicate, 480 predictions in total across all five models), and error bars are calculated from the sets of triplicates. Predictions were considered outside of the ground state if their Activation Loop backbone RMSD vs. the ground state reference (PDB ID 6XR6) was above 3.5 Å. Data are presented as mean values +/- standard error of the mean.

104 Notably, models 3, 4, and 5 showed the best accuracy at predicting the effects of the Abl1 mutations,  
 105 especially for the activating mutations. Models 3 and 5 showed the smallest variance, presumably due  
 106 to the larger number of training samples used to generate them. Interestingly, all 5 models incorrectly  
 107 predicted the M290L mutation as strongly inactivating, with models 5 and 2 leading to the most incorrect  
 108 predictions. This unanimous inaccuracy suggests that the factors that lead to the Abl1 M290L mutants  
 109 being incorrectly predicted potentially stem from other parts of the model not affected by the differences  
 110 highlighted in Supplementary Table 3.

111 In summary, we observed significant differences in the accuracy of the predictions of relative state  
 112 populations of Abl1 variants between the five models included in the current implementation of AF2.  
 113 It is not in the scope of this study to explore which model is most appropriate for a given test case, but  
 114 we anticipate that the observation that models that were refined in the absence of templates led to more

115 accurate predictions could be useful for further work seeking to answer this and related questions.

## 116 GMCSF Chemical Shift Perturbations

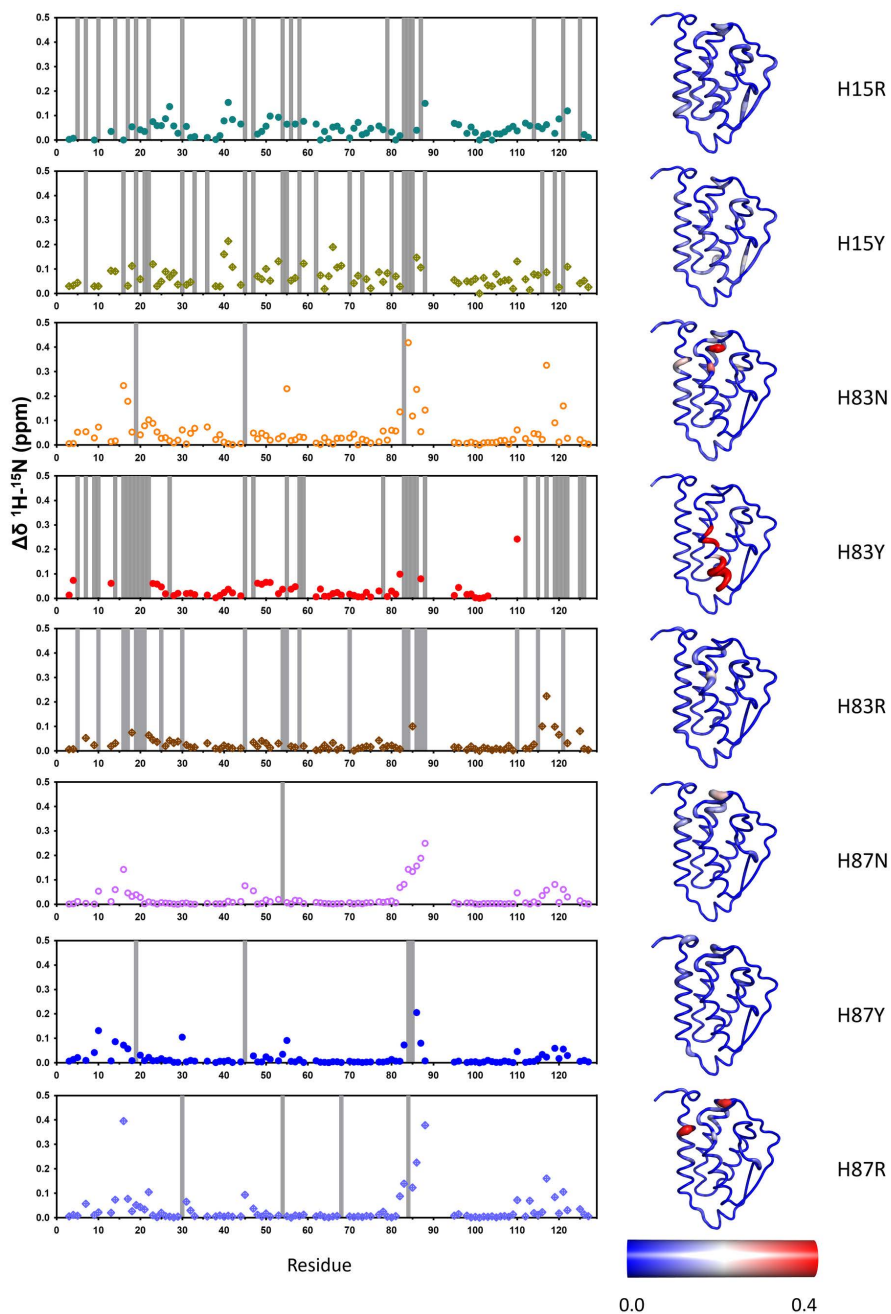

**Supplementary Figure 11:**  $^1\text{H}$ - $^{15}\text{H}$  Chemical shift perturbations for mutant GMCSF constructs relative to wild-type GMCSF peaks. Vertical bars indicate residues whose signal was lost due to chemical exchange broadening.

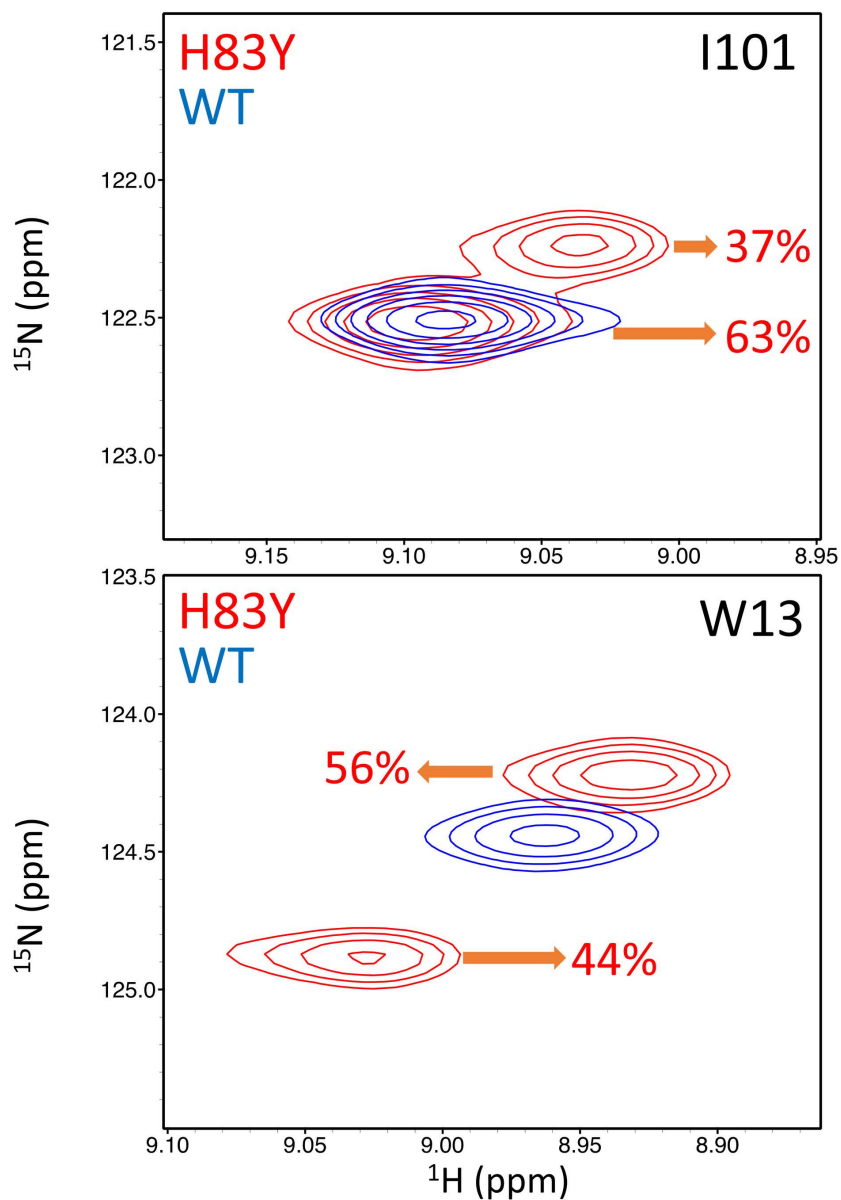

**Supplementary Figure 12:** Overlay of heteronuclear single quantum coherence measurements from WT GMCSF and the H83Y mutant showing residues experiencing slow exchange. The appearance of multiple resonances denotes a shift in the conformational exchange experienced at these residues in the mutant GMCSF. The relative populations of each conformer can be approximated by the resonance intensities (or volumes).

117 **Optimization of AF2 Parameters for the GMCSF Protein**

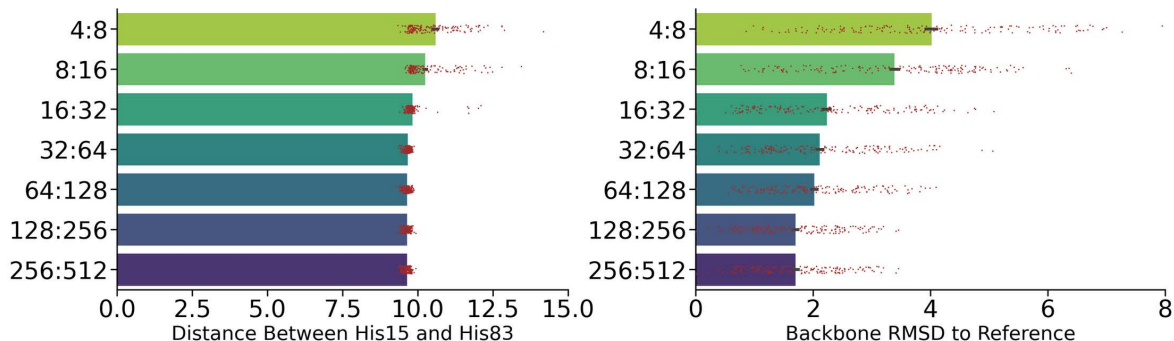

**Supplementary Figure 13:** Optimal AF2 subsampling parameters for GMCSF. (Left) Effects of modifying the *max\_seqs* and *extra\_seqs* values on the diversity of the distances between the H15 and H83 residues observed, which is a proxy for the opening of the heparin-binding site in GMCSF. (Right) Effects of modifying the *max\_seqs* and *extra\_seqs* values on the diversity of the root mean square deviation of atomic positions (RMSD) of the GMCSF backbone with respect to the ground state reference (the prediction closest to PDB 1CSG [13]). Data are presented as mean values +/- standard error of the mean.



# GMCSF Conformational Ensemble Predictions

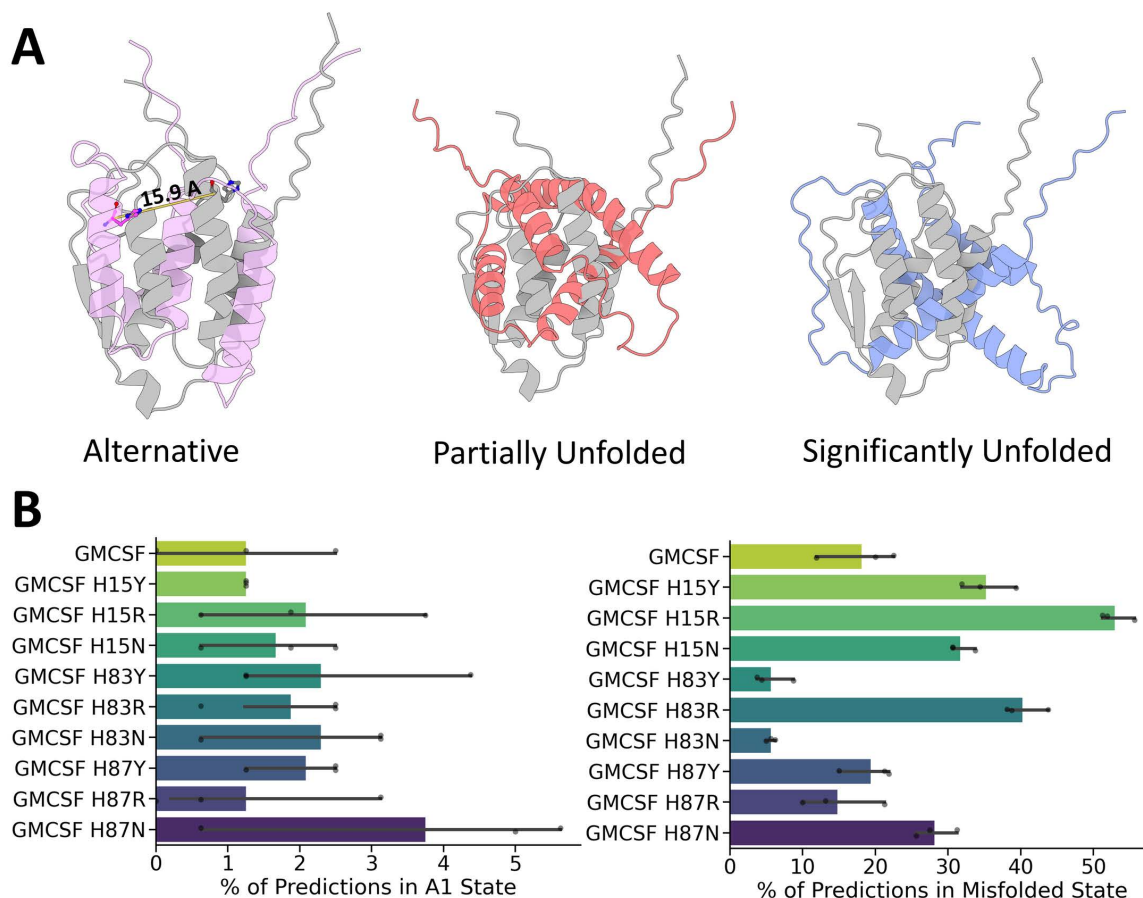

**Supplementary Figure 14:** Unusual GMCSF states predicted by subsampled AF2 and the respective populations of those states. (A) Structure of the most common alternative state predicted by AF2 (A1, in pink) aligned with and overlain on a ground state prediction (in grey). The distance between H83 in the reference and in conformation A1 is displayed as a measure of the difference between the conformations. Also shown are two misfolded/unfolded predictions aligned with and overlain on the ground state prediction (in grey). (B) AF2 predictions of the relative populations of the A1 conformation and the misfolded/unfolded structures. Conformations were classified as the A1 conformation based on the distance between the H15 and H83 residues (greater than 11 Å) and overall backbone RMSD vs. ground state reference (greater than 5 Å but less than 10 Å), while they were classified as misfolded/unfolded based on overall backbone RMSD vs. the ground state reference (equal to or greater than 13 Å). Data are presented as mean values +/- standard error of the mean.

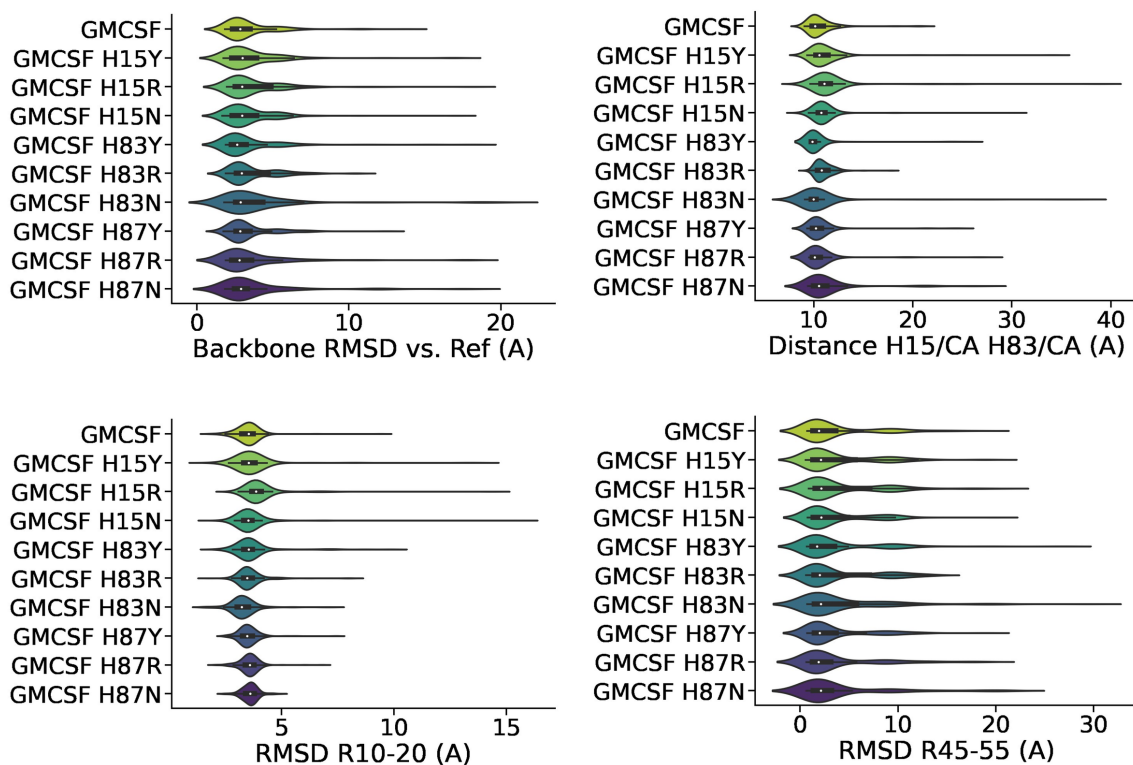

**Supplementary Figure 15:** AF2 predictions of the distributions of different GMCSF properties. Every RMSD measurement was taken with respect to the ground state reference (the prediction closest to PDB 1CSG).

## 119 Supplementary Appendix: Additional Test Cases

120 In order to measure the potential of our subsampled AF2 approach as a general tool for predicting the  
 121 alternative conformations of proteins and their relative populations, we curated a test set of eight proteins  
 122 with significantly different functions, lengths, conformational landscapes, and evolutionary histories.  
 123 The composition of this test set is summarized below in Supplementary Table 4.

**Supplementary Table 4:** Additional test set composition.

| Example             | Measurement     | Ref. 1                  | Ref. 2                     | MSA Depth |
|---------------------|-----------------|-------------------------|----------------------------|-----------|
| <b>Calmodulin</b>   | Backbone        | Bent linker (4BW7b)     | Extended linker (4BW8b)    | 77210     |
| <b>Fyn SH3</b>      | C-Term. BB      | Ordered C-Term. (Pred.) | Disordered C-Term. (Pred.) | 50521     |
| <b>AlkB</b>         | Binding site BB | Closed (3I49a)          | Open (Pred.)               | 14236     |
| <b>CCR5</b>         | Backbone        | Inactive (5UIWa)        | Active (7F1Qr)             | 62583     |
| <b>LmrP</b>         | Backbone        | Outward-Facing (6T1Za)  | Inward-Facing (Pred.)      | 4724      |
| <b>LAT1</b>         | Backbone        | Inward-Facing (6IRSb)   | Outward-Facing (7DSQb)     | 53314     |
| <b>Aurora A</b>     | A-Loop BB       | Ground/Active (6XR6a)   | I2/Inactive (6XRGa)        | 820754    |
| <b>C. Anhyd. IV</b> | Backbone        | Ground (3FE4a)          | Ground (Pred.)             | 40033     |

124 Importantly, all the proteins in the test set with the exception of Carbonic Anhydrase (which is in-  
125 cluded as a negative control) are known to occupy distinct conformational states. Three proteins in the  
126 test set have been previously studied in other AlphaFold subsampling studies (LmrP, LAT1, and CCR5),  
127 with mixed results [14]. Below, we describe our prediction results in detail for each protein in the test  
128 set.

## 129 **CCR5**

130 The C-C Chemokine Receptor Type 5 (CCR5) is an immune system protein expressed on the surface  
131 of white blood cells [15]. Previous studies seeking to predict different conformations of CCR5 using  
132 subsampled AlphaFold were not successful in predicting significantly different alternative conformations  
133 of CCR5, such as the active conformation shown in PDB 7F1Qr [14, 16]. This lack of resolution in  
134 subsampled AF was attributed to biases introduced by the training set composition, as the alternative  
135 conformation was published in the PDB in 2021 and thus was not included in AlphaFold’s training set  
136 [16].

137 To test if our subsampled AF2 approach fared any better than previous attempts at predicting alter-  
138 native conformations of CCR5, we made a series of predictions of CCR5 with different subsampling  
139 conditions ranging from 4:8 to 1024:2048 (max\_seq:extra\_seq), with a total of 480 individual predic-  
140 tions for each subsampling condition (96 seeds times five models). The results of these predictions are  
141 summarized in Supplementary Figure 16.

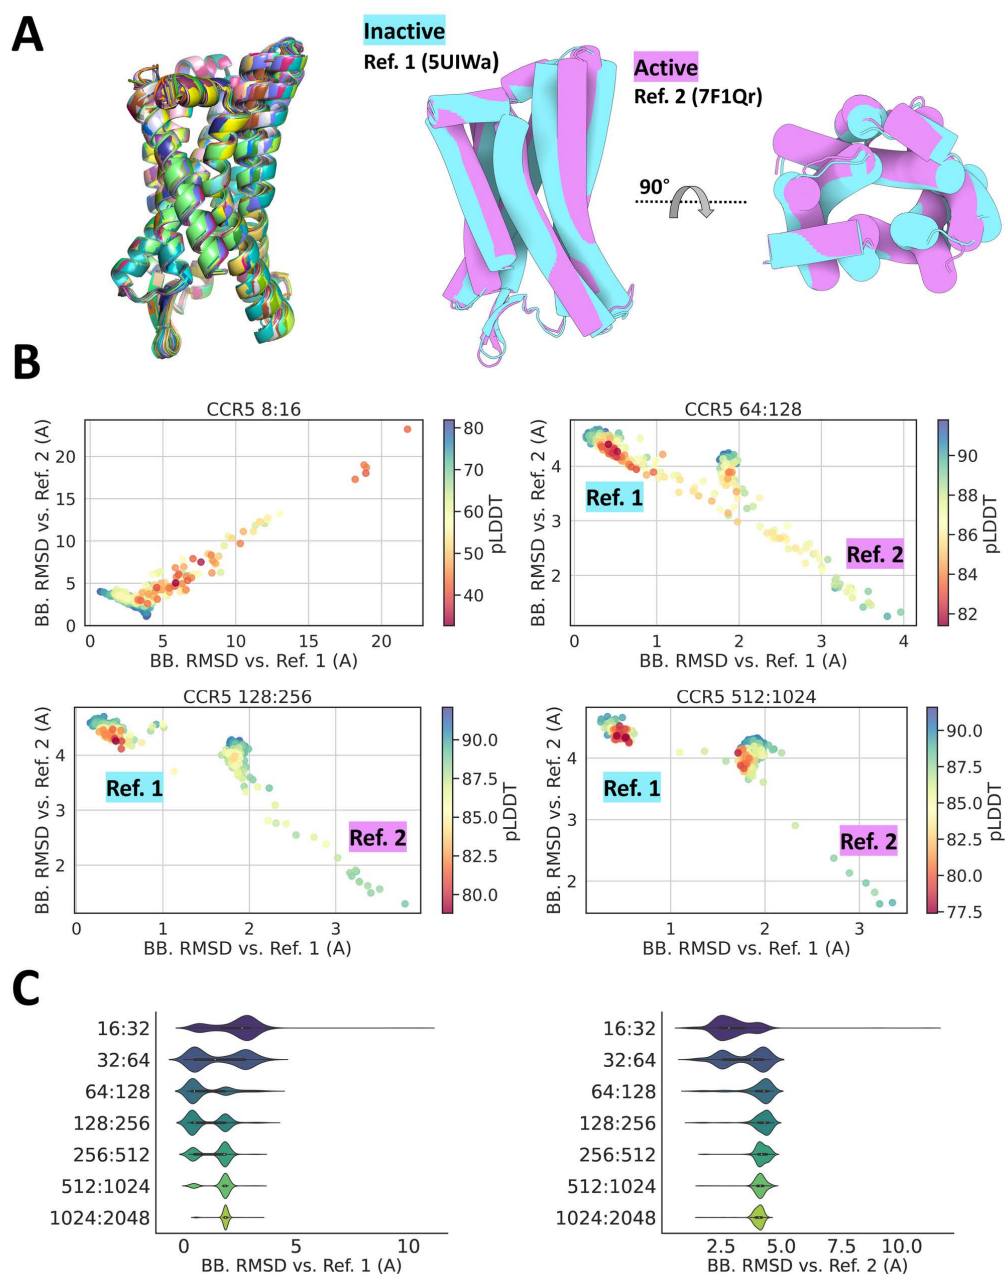

**Supplementary Figure 16:** Predictions for the CCR5 system using the subsampled AF2 methodology described in this study. (A) (left) Structural models obtained from the prediction method, aligned to the top-ranked prediction by pLDDT (AF2's confidence metric) and overlaid on top of each other in different colors; (middle) Rendering of the conformational references used to summarize the prediction results in the backbone RMSD vs. references scatterplots, each structure is colored according to its accompanying label; and (right) Alternate view of the structural references. (B) Bidimensional projection of four sample prediction results, comparing the similarity of each prediction to either Ref. 1 (inactive, PDB ID 5UIWa) or Ref. 2 (active, PDB ID 7F1Qr) by a backbone RMSD metric. Predictions are colored by average pLDDT, which is a metric of AlphaFold2's confidence in the resulting model. (C) Distribution of backbone RMSD values vs. each reference for each subsampling condition tested (conditions 4:8 through 16:32 omitted from the plot to avoid distortion of the X axis).

142 Surprisingly and in contrast with previous methods, our approach leads to predictions of CCR5 both  
143 in the ground and alternative state with most subsampling conditions, with good coverage of in-between  
144 conformations along the putative transition pathway. Decreasing the level of subsampling leads to re-  
145 duced conformational diversity, as observed in the Abl1 and GMCSF examples. Interestingly, at low sub-  
146 sampling levels (512:1024, for instance), the CCR5 predictions still strongly sample both tested states,  
147 but an intermediate conformation which is significantly closer to the inactive reference is predicted more  
148 often. This effect is similar to the one observed by del Alamo and collaborators in their predictions of  
149 different conformations of CCR5 [14], and again reinforces the goldilocks principle of choosing sub-  
150 sampling conditions for predicting the relative populations of alternative states of a given system (that  
151 is, identifying the subsampling parameters that minimize the prediction of unfolded/nonphysical states  
152 while maximizing conformational diversity along a path defined by putative states as endpoints).

153 Finally, we hypothesize that our approach successfully predicts CCR5 in its active state (similar to  
154 PDB ID 7F1Qr) while previous subsampling methods fell short due primarily to the choice of using a  
155 deep MSA built with jackhmmer instead of mmseqs2. Recent works have shown that MSA depth and  
156 coverage directly affect AlphaFold2's accuracy [17], which is in line with our observations of how these  
157 factors impacted the CCR5 predictions.

## 158 **LmrP**

159 Multidrug transporters such as LmrP and LAT1 shift between two major states in their transport cycles,  
160 the outward-facing (OF) and the inward-facing (IF) conformations [18, 19]. In the CASP14 challenge,  
161 AlphaFold predicted LmrP with the highest confidence in the inward-facing conformation [20]. This is  
162 intriguing because previous studies have found that LmrP predominantly occupies the outward-facing  
163 conformation [19], and although there is a PDB structure of LmrP in the outward-facing conformation  
164 (PDB ID 6T1Za), it was published in 2020 and thus was not included in AlphaFold's training dataset  
165 [21]. Given this, the field's leading hypothesis for the preferential prediction of an alternate state of  
166 LmrP by AlphaFold was that other transporters in the IF conformation were present in the AlphaFold  
167 training dataset, leading to bias towards the prediction of LmrP in the IF conformation [14, 20].

168 In stark contrast to previous studies that predicted the structure of LmrP with AlphaFold [20], and  
169 as a direct refutation of the training bias hypothesis, our approach successfully predicts LmrP more  
170 frequently in the most stable state (OF) in certain subsampling conditions. These predictions occur in  
171 subsampling values below 64:128, after which the conformational preference is shifted and the IF state  
172 is predicted more often (Supplementary Figure 17).

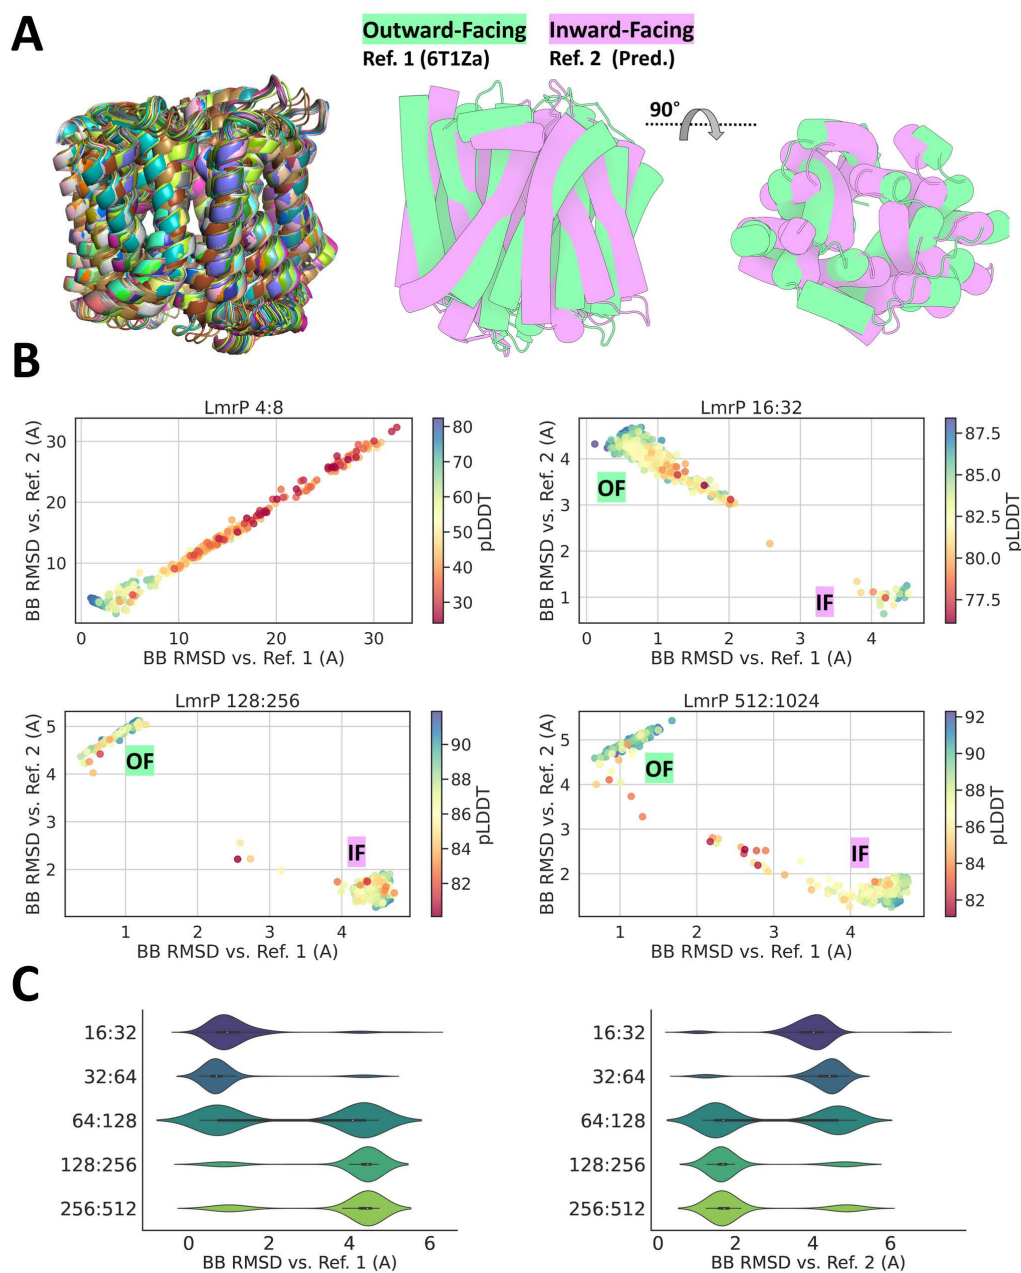

**Supplementary Figure 17:** Predictions for the LmrP system using the subsampled AF2 methodology described in this study. (A) (left) Structural models obtained from the prediction method, aligned to the top-ranked prediction by pLDDT (AF2’s confidence metric) and overlaid on top of each other in different colors; (middle) Rendering of the conformational references used to summarize the prediction results in the backbone RMSD vs. references scatterplots. Each structure is colored according to its accompanying label; and (right) alternate view of the structural references. (B) Bidimensional projection of four sample prediction results, comparing the similarity of each prediction to either Ref. 1 (outward-facing, PDB ID 6T1Za) or Ref. 2 (inward-facing, AF2 prediction) by a backbone RMSD metric. Predictions are colored by average pLDDT, which is a metric for AlphaFold2’s confidence in the resulting model. (C) Distribution of backbone RMSD values vs. each reference for each subsampling condition tested.

173 This prediction preference shift suggests that, in some cases, the selection of the appropriate subsam-  
174 pling conditions without prior knowledge is non-trivial. It is not within the scope of this study to resolve  
175 a one-size-fits-all approach for selecting subsampling conditions, but a few observations could form a  
176 general outline for further studies seeking to find a common heuristic toward that goal. As an example,  
177 we observed that subsampling levels that led to incorrect relative state populations (such as 128:256 and  
178 512:1024) also led to the prediction of a significant number of conformations that did not closely map to  
179 the IF to OF putative pathway. The subsampling condition that mostly mirrored experimentally resolved  
180 conformational state populations (16:32) had very few predictions outside of that diagonal. This points  
181 towards a potential parameter for further evaluating subsampling conditions if the goal is to quantify  
182 relative state populations without any prior knowledge of the system.

183 Finally, we hypothesize that our approach successfully predicts LmrP in its OF state more frequently  
184 while previous subsampling methods failed due primarily to the choice of using a deep MSA built with  
185 jackhmmer instead of mmseqs2. Recent studies have shown that MSA depth and coverage directly affect  
186 AlphaFold2's accuracy [17], which is in line with our observations for how these factors impacted the  
187 LMRP and CCR5 predictions. Notably, predictions of LmrP with an MSA built from mmseqs2 only  
188 have the IF state as the most populated conformation regardless of subsampling level (Supplementary  
189 Figure 19), which we know to be inaccurate.

## 190 **Effects of MSA Depth and Content**

191 Considering the contrasting results obtained from the predictions made from multiple sequence align-  
192 ments (MSAs) built from either the jackhmmer or mmseqs2 method, we sought to explore how MSA  
193 depth and content affected subsampled's AF2 ability to predict alternative conformations and relative  
194 state populations. The rationale for this test stems from the fact that jackhmmer frequently assembles  
195 significantly deeper MSAs than mmseqs2, due to differences in the queried datasets (jackhmmer searches  
196 UniRef90, smallbfd, and mgnify, while mmseqs2 searches UniRef100, PDB70, and an environmental se-  
197 quence dataset) and due to mmseqs2 including an early stop heuristic to minimize the search space after  
198 a threshold of sequences is found [22].

199 Initially, we evaluated how wild-type Abl1 kinase core ensembles varied between predictions made  
200 with either the MSA built with jackhmmer ( $n = 614,759$  sequences) or with mmseqs2 ( $n = 30,502$  se-  
201 quences). As an important control, we also evaluated predictions generated with a modified jackhmmer  
202 MSA, truncated at  $n = 30,502$  sequences, in order to isolate the potential contributions of MSA composi-  
203 tion beyond just depth. Importantly, this truncated jackhmmer MSA has the same number of sequences  
204 as the mmseqs2 MSA, but the sequences in the former are significantly more similar to each other than  
205 in the latter. As an additional control, we also made predictions with just the Abl1 kinase core sequence  
206 alone, obviating any coevolutionary signal. The results of this analysis are summarized in Supplemen-  
207 tary Figure 18.

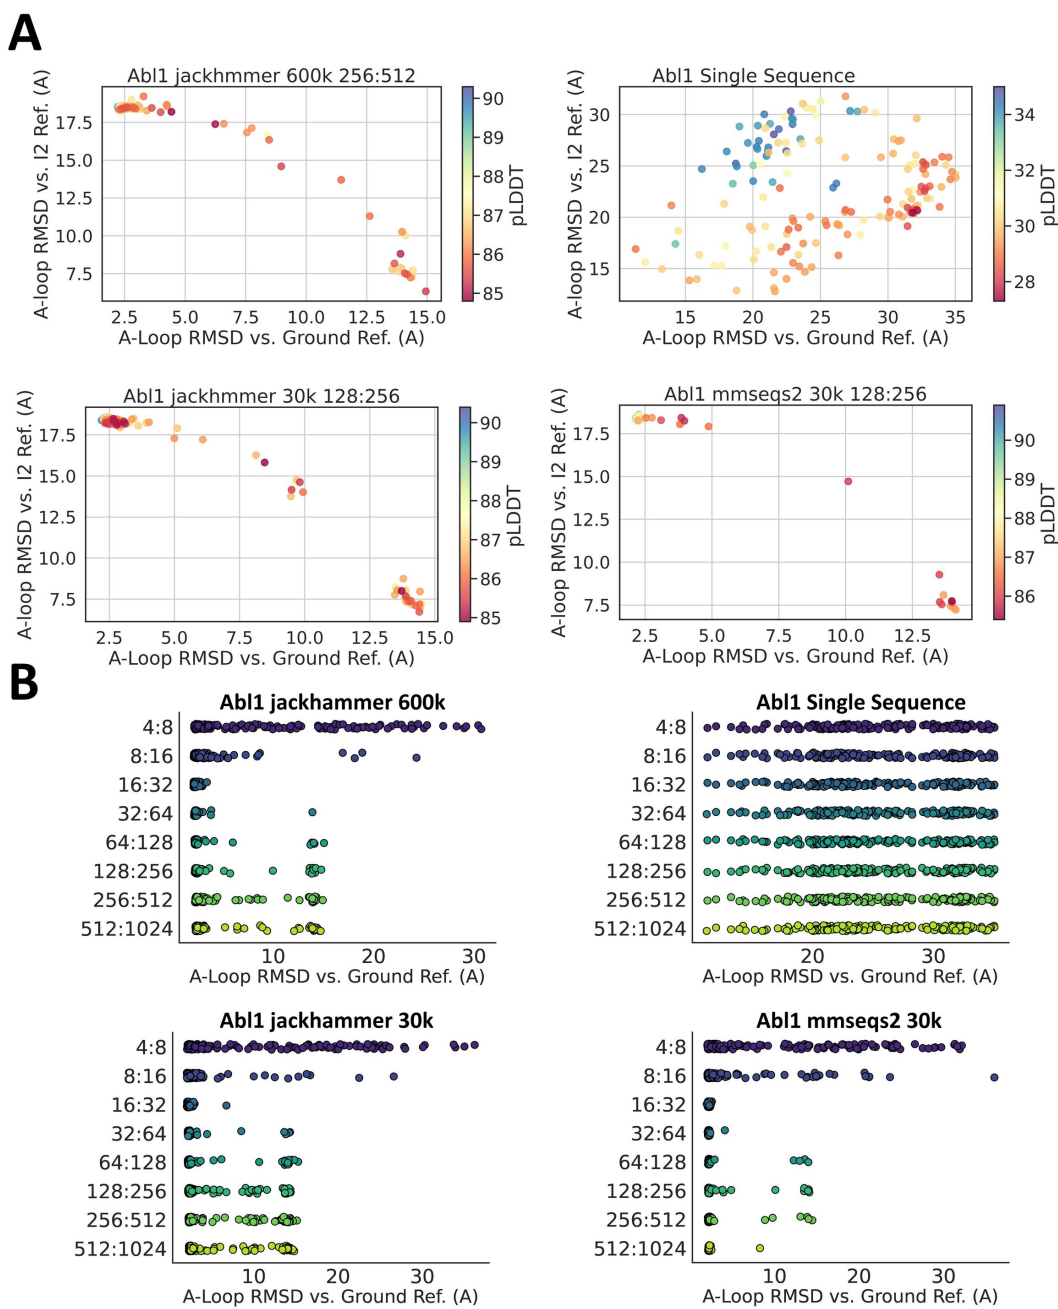

**Supplementary Figure 18:** Effects of MSA length and composition in AlphaFold2’s capacity for predicting different conformations of the Abl1 kinase domain. (A) Bidimensional projection of prediction ensembles for the Abl1 kinase core in subsampling conditions 256:512 using different MSA lengths and compositions, summarized by the backbone RMSD of the A-Loop vs. the Ground (PDB ID 6XR6) or the I2 (PDB ID 6XRG) reference. Points are colored by pLDDT, which is a metric of AF2’s confidence in the prediction. (B) Results for each prediction ensemble in different subsampling conditions ranging from 4:8 to 512:1024 with different MSA lengths and compositions, summarized as the backbone RMSD of the A-Loop of each prediction vs. the ground reference (PDB ID 6XR6). In both A and B, each dot represents a single prediction ( $n = 480$ ).

208 Crucially, the ensemble resulting from the single sequence prediction leads to mostly unfolded struc-  
 209 tures that are not similar to the known organization of the Abl1 kinase core (or of any kinase core). This



210 suggests that, in the absence of templates, the presence of a coevolutionary signal from the input MSA is  
 211 essential for accurately predicting kinase core conformations. In line with previous observations for the  
 212 CCR5 and LmrP examples, the predictions using the mmseqs2 MSA as input led to considerably fewer  
 213 intermediate conformation predictions for the Abl1 kinase core than those from the jackhammer MSA.  
 214 Interestingly, the truncated jackhammer MSA designed to be the same depth as the mmseqs2 MSA still  
 215 led to considerably more conformations along the Ground to I2 path in Abl1 kinase core predictions.  
 216 These results match recent studies that found that MSA depth leads to increased accuracy in AF2 pre-  
 217 dictions [17], while also recapitulating previous results that found that MSA entropy (that is, the average  
 218 distance between pairs of sequences) also plays a significant role. Although it is within the scope of this  
 219 study to answer why this is the case, we hypothesize that MSAs with lower entropy cause AF2 to more  
 220 easily distill the coevolutionary signal pertaining to conformations that would otherwise be lost in MSAs  
 221 with larger distances between sequences.

222 Considering the above and the observation that our subsampled AF2 approach using MSAs from  
 223 jackhammer succeeded at sampling challenges that were not met by previous studies using MSAs from  
 224 mmseqs2, we repeated the CCR5 and LmrP predictions with MSAs from mmseqs2 and contrasted the  
 225 results with our previously discussed prediction ensembles (generated with the jackhammer MSAs). The  
 226 results of this analysis are summarized in Supplementary Figure 19.

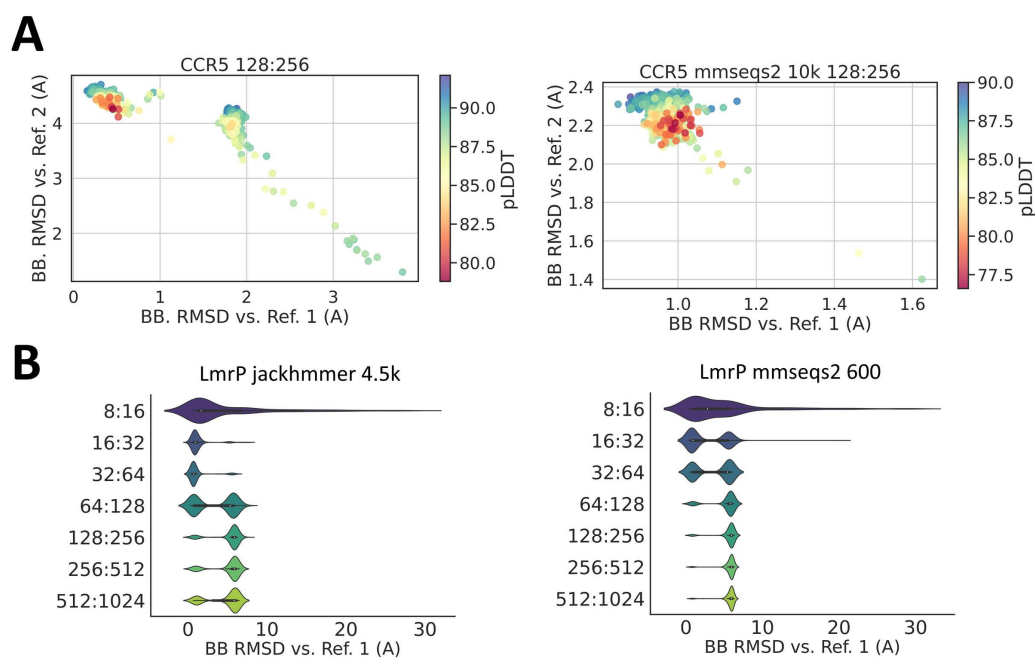

**Supplementary Figure 19:** Effects of MSA length and composition in AlphaFold2's capacity for predicting different conformations of CCR5 and LmrP. (A) Bidimensional projection of results for ensembles of CCR5 predictions generated with either the MSA from jackhammer or from mmseqs2. Results are summarized according to a backbone RMSD metric vs. either the inactive state (Ref. 1, PDB ID 5UIWa), or the active state (Ref. 2, PDB ID 7F1Qr). (B) Distribution of LmrP predictions according to a backbone RMSD metric vs. the outward-facing conformation (Ref. 1, PDB ID 6T1Za). Ensembles were predicted from an MSA stemming from either jackhammer (left) or mmseqs2 (right).

227 In the CCR5 example, predictions by del Alamo and collaborators did not lead to structures that sig-  
 228 nificantly diverged from the conformation present in the AlphaFold training set [14]. These results are

229 replicated by our predictions with the mmseqs2 MSA (n = 10,066 sequences), where the vast majority of  
230 predictions in the ensemble represent the inactive form, which is present in the AF training set (inactive.  
231 PDB ID 5UIWa). As previously discussed in Supplementary Figure 16 and Supplementary Figure 19,  
232 our predictions with the MSA built from jackhmmer (n = 62,583 sequences) frequently populate the al-  
233 ternative state (active, PDB ID 7F1Qr, not present in the AF training set) and intermediate conformations  
234 between both states.

235 Additionally, both del Alamo and collaborators and the original implementation of AlphaFold for the  
236 CASP14 challenge found LmrP to be predicted more frequently in its inward-facing conformation [14,  
237 20], despite the outward-facing conformation being the most frequently populated according to experi-  
238 mental data [19]. In Supplementary Figure 19, we show that predictions with the MSA from mmseqs2  
239 (n = 628 sequences) lead to ensembles where the inward-facing conformation of LmrP is predicted in  
240 either similar frequencies to the outward-facing conformation, or exponentially more frequently. This is  
241 in stark contrast to the previously discussed predictions created from the jackhmmer MSA (n = 4,724  
242 sequences), in which the outward-facing conformation is correctly predicted as the dominant state in  
243 certain subsampling conditions.

244 All in all, these results highlight the importance of considering MSA depth and entropy when seeking  
245 to predict the different conformational states of proteins and their relative state populations and should  
246 pave the way for future studies seeking to better understand what specific MSA elements are the most  
247 important for conformational preference in AF2 predictions.

## 248 **LAT1**

249 LAT1 is another transporter that converts between the inward-facing and outward-facing configurations  
250 [23], and was also tested in previous subsampling AF2 studies [14]. Contrary to CCR5, previous studies  
251 were successful in predicting both major conformations of LAT1 with AF2 [14]. To see how our approach  
252 fares at replicating the above results considering the contrasting results we obtained for CCR5 and LmrP,  
253 we made predictions for LAT1 using the previously described alternative subsampling conditions (4:8  
254 to 1024:2048 max\_seq:extra\_seq, 480 individual predictions - 96 seeds \* five models) and analyzed  
255 for the presence of both IF and OF conformations and putative in-between states. The results of these  
256 predictions are described in Supplementary Figure 20.

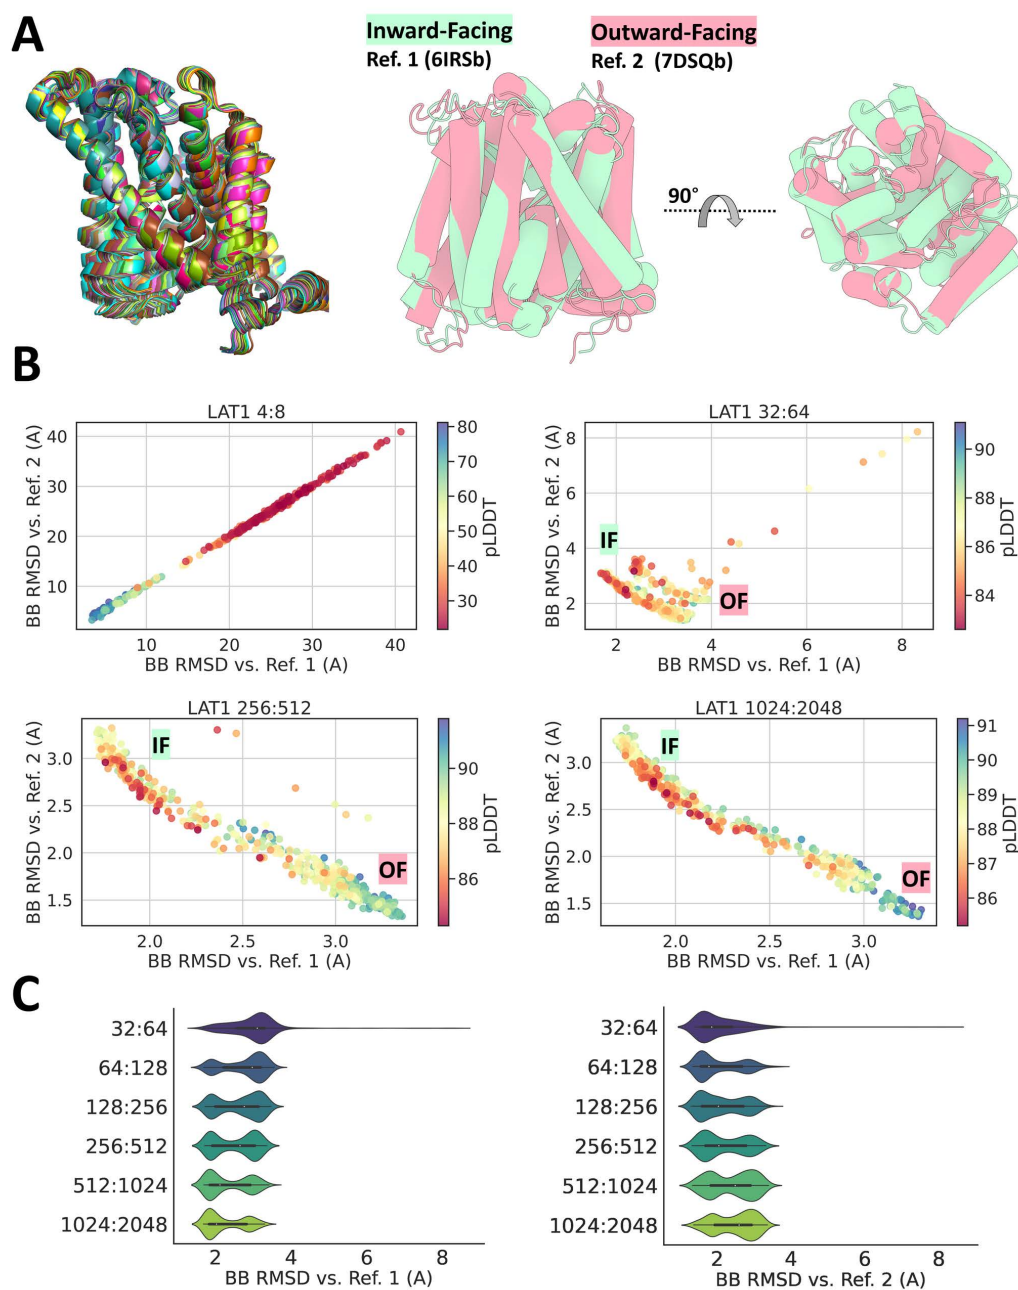

**Supplementary Figure 20:** Predictions for the LAT1 system using the subsampled AF2 methodology described in this study. (A) (left) Structural models obtained from the prediction method, aligned to the top-ranked prediction by pLDDT (AF2’s confidence metric) and overlaid on top of each other in different colors; (middle) Rendering of the conformational references used to summarize the prediction results in the backbone RMSD vs. references scatterplots. Each structure is colored according to its accompanying label; and (right) alternate view of the structural references. (B) Bidimensional projection of four sample prediction results, comparing the similarity of each prediction to either Ref. 1 (inward-facing, PDB ID 6IRSb) or Ref. 2 (outward-facing, 7DSQb) by a backbone RMSD metric. Predictions are colored by average pLDDT, which is a metric for AlphaFold2’s confidence in the resulting model. (C) Distribution of backbone RMSD values vs. each reference for each subsampling condition tested.

257 Notably, our predictions closely resemble those obtained by del Alamo and collaborators in terms of  
258 the distribution between conformations at different subsampling conditions [14], with lower subsampling  
259 conditions such as 256:512 and above leading to predictions primarily of the IF state.

## 260 **Calmodulin**

261 Calmodulin is a 16.7 kDa (148 AA), highly conserved calcium-binding protein composed of two sym-  
262 metrical terminal globular domains connected by a flexible linker [24]. Each terminal domain contains a  
263 pair of EF-hand motifs, for a total of four calcium binding sites [25]. In the absence of calcium and/or in  
264 the presence of binders, Calmodulin assumes a collapsed and compact form, with the central linker dis-  
265 ordered [26, 27]. The apo version of the protein becomes highly organized upon calcium saturation, and  
266 the central linker forms a mostly stable helix that converts between a fully extended and a bent confor-  
267 mation in solution [27]. Importantly, E84 deletions in Calmodulin are known to change the propensity  
268 for the formation of the extended form of calcium-saturated apo Calmodulin in solution [28], and the  
269 M124L mutation has similar effects to E84K in biochemical assays [29].

270 Considering the above, we sought to test how our subsampled AF2 approach fares at predicting the  
271 interesting intrinsic dynamics of calcium-saturated apo calmodulin, as well as the effects of the two point  
272 mutations (E84K and M124L) suspected to alter its conformational equilibrium [28, 29]. To do so, we  
273 first predicted the structure of chicken Calmodulin using subsampled AF2 with different subsampling  
274 conditions ranging from 4:8 to 1024:2048 (max\_seq:extra\_seq), with 480 individual predictions for each  
275 condition (96 seeds times 5 models) and evaluated the resulting ensembles (Supplementary Figure 21).

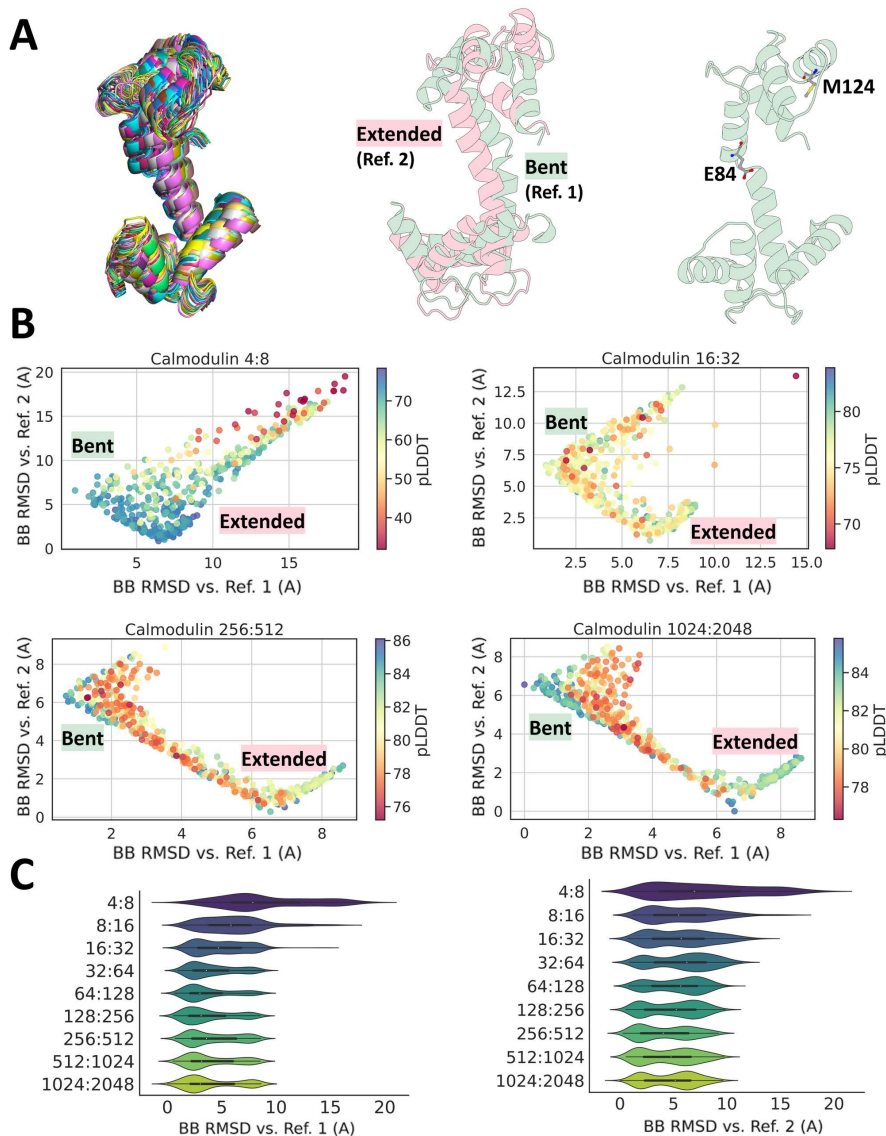

**Supplementary Figure 21:** Predictions for the Calmodulin system using the subsampled AF2 methodology described in this study. (A) (left) Structural models obtained from the prediction method, aligned to the top-ranked prediction by pLDDT (AF2’s confidence metric) and overlaid on top of each other in different colors; (middle) Rendering of the conformational references used to summarize the prediction results in the RMSD vs. references scatterplots. Each structure is colored according to its accompanying label; and (right) Positions of residues suspected to affect relative state populations when mutated. (B) Bidimensional projection of four sample prediction results, comparing the similarity of each prediction to either Ref. 1 (bent central linker, PDB ID 4BW7b) or Ref. 2 (extended central linker, PDB ID 4BW8b) using a backbone RMSD metric. Predictions are colored by average pLDDT, which is a metric for AlphaFold2’s confidence in the resulting model. (C) Distribution of backbone RMSD values vs. each reference for each subsampling condition tested (4:8 and 8:16 are omitted due to a high frequency of unfolded predictions, which would warp the X axis).

276 Analysis revealed that the vast majority of the predicted structures adopt the ordered conformation  
 277 (Supplementary Figure 21A). Although AF2 does not allow for the inclusion of ions in the modeling pro-  
 278 cess, this preference towards the ordered conformation might be due to training set composition biases.

279 Importantly, for most of the subsampling conditions, the ensembles presented a bimodal distribution of  
280 conformations, with the first mode representing the ordered conformation of Calmodulin with the central  
281 linker bent, consistent with previous studies that found that calcium-saturated chicken Calmodulin  
282 assumes this conformation in solution [30]. The other mode, significantly less populated, corresponds to  
283 the ordered Calmodulin conformation with the fully extended central linker [28].

284 Besides the identification of two significantly populated conformations of calcium-saturated apo  
285 chicken Calmodulin in the wild-type prediction, subsampling conditions above 8:16 also led to the  
286 prediction of a range of intermediate conformations between each stable state (Supplementary Figure  
287 21B). Crucially, the intermediate conformations appear to cover most of the range between the bent and  
288 extended states.

289 Considering the success of subsampled AF2's approach in predicting the two main states of ordered  
290 chicken Calmodulin, we sought to test if our heuristic could also correctly predict the suspected effects  
291 of the E84K and M124L mutations. For this comparison, we chose the 256:512 subsampling conditions  
292 because they led to the best coverage of the putative path between the two main states in the wild-type  
293 predictions.

294 As seen in Supplementary Figure 22, our approach predicts that the E84K mutation increases the  
295 propensity for forming the extended linker, which is a phenotype similar to E84 deletions [28], as that  
296 state's relative population is significantly increased in our E84K predictions. Additionally, the M124L  
297 mutation has similar effects to E84K in biochemical assays and is hypothesized to also affect linker  
298 conformation [29]. This potential similarity is captured by the subsampled AF2 predictions for the  
299 M124L mutant, which led to a reduced population of the bent conformation, although not as drastic as  
300 the E84K mutation.

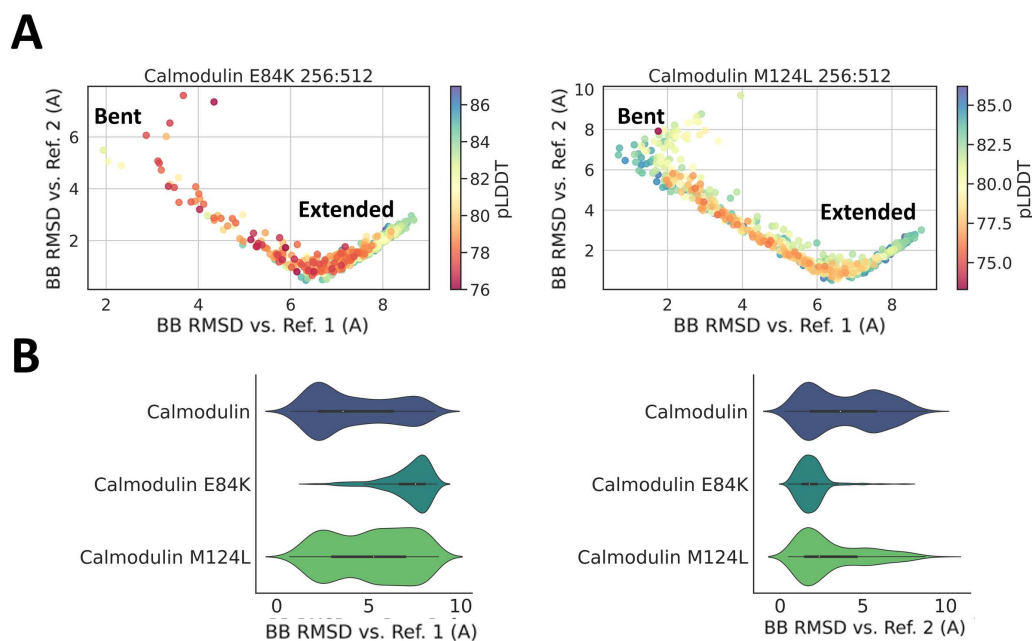

**Supplementary Figure 22:** Predictions for Calmodulin mutants. (A) Bidimensional projection of predictions for the (left) E84K mutant with 256:512 subsampling conditions and (right) M124L mutant with 256:512 subsampling conditions, comparing the similarity of each prediction to either Ref. 1 (bent central linker, PDB ID 4BW7b) or Ref. 2 (extended central linker, PDB ID 4BW8a). (B) Distribution of backbone RMSD values vs. each reference for the wild-type reference and for the tested mutants in the 256:512 subsampling conditions.

301 In summary, our subsampled AF2 approach correctly identified the two main states of calcium-  
302 saturated chicken Calmodulin. The resulting predictions are distributed in a manner that correlates with  
303 experimentally determined conformational preferences. Finally, our approach also correctly predicted  
304 the effects of two mutations suspected to decrease the stability of the bent linker state, by leading to  
305 ensembles in which the extended state is predicted more frequently.

### 306 **Fyn-SH3 Triple Mutant**

307 The Src-homology 3 (SH3) is a protein domain composed of approximately 65 amino acids [31]. It is  
308 found in a large number of eukaryotic proteins related to signal transduction and is functionally important  
309 for protein/protein interactions [31, 32]. Fyn, a kinase of the Src family, contains an SH3 domain (Fyn-  
310 SH3) that is crucial for regulating kinase activity [33, 34]. Fyn-SH3 has been previously used as a model  
311 for studying protein folding [35–38], and information about the relative population of different states  
312 is abundant [39]. Further, substitutions in Fyn-SH3 such as the triple mutant A39V+N53P+V55L are  
313 known to cause it to interact strongly with other copies of itself, leading to aggregation [39]. Importantly,  
314 these mutations lead to the aggregation phenotype by disrupting the order of the C-terminus of Fyn-SH3,  
315 which preferentially forms a stable beta-sheet [39]. In the mutant proteins, the C-terminus of Fyn-SH3 is  
316 significantly less stable during the folding process, exposing the aggregation-prone amino-terminal beta  
317 strand [39].

318 The interesting dynamics of SH3 domains and the extensive literature pertaining to altered conforma-  
319 tional equilibriums in response to mutations make Fyn-SH3 an excellent challenge for our subsampled  
320 AF2 method. We started by making predictions of the triple mutant form of Fyn-SH3 (residues 7 to  
321 63, based on PDB ID 2LP5a) using different subsampling levels, ranging from 4:8 to 1024:2048, with a  
322 sample size of 480 predictions per ensemble (96 seeds \* 5 models). The results of this are presented in  
323 Supplementary Figure 23.

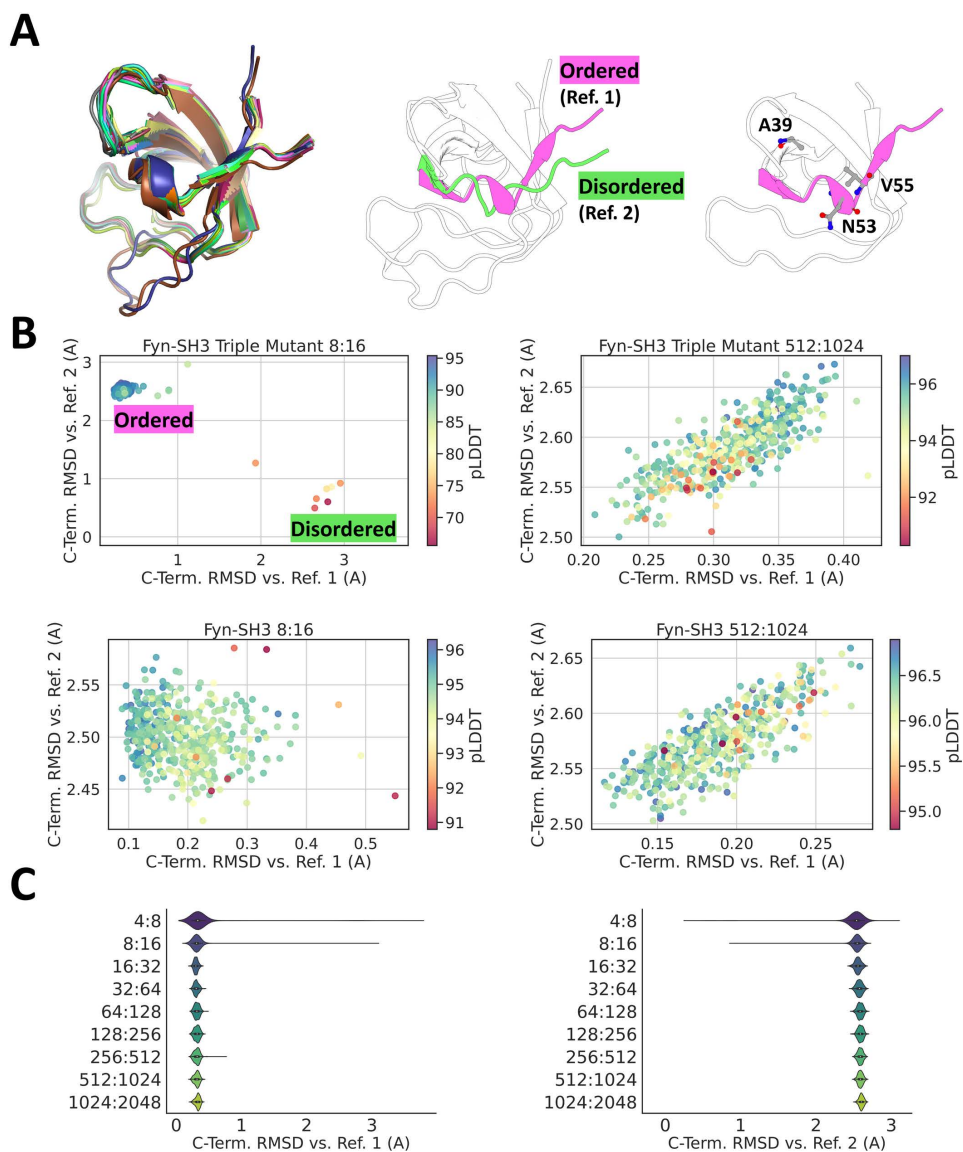

**Supplementary Figure 23:** Predictions for the Fyn-SH3 triple mutant/wild-type system using the subsampled AF2 methodology described in this study. (A) (left) Structural models obtained from the prediction method, aligned to the top-ranked prediction by pLDDT (AF2’s confidence metric) and overlaid on top of each other in different colors; (middle) Rendering of the conformational references used to summarize the prediction results in the C-terminus backbone RMSD vs. references scatterplots. Each structure is colored according to its accompanying label; and (right) position of residues known to affect relative state populations when mutated. (B) Bidimensional projection of two sample prediction results for triple mutant Fyn-SH3 (top) or to wild-type Fyn-SH3 (bottom) comparing the similarity of each prediction to either Ref. 1 (ordered C-terminus, chosen from the AF2 prediction ensemble) or Ref. 2 (disordered C-terminus, chosen from the AF2 prediction ensemble) by a C-terminus backbone RMSD metric. Predictions are colored by average pLDDT, which is a metric of AlphaFold2’s confidence in the resulting model. (C) Distribution of C-terminus backbone RMSD values vs. each reference for each subsampling condition tested for triple mutant Fyn-SH3.



325 dered C-terminus is stabilized in the triple mutant, with a population of 2%, and has not been detected in  
326 the wild-type.

327 Surprisingly, only the subsampling conditions 4:8 and 8:16 (max\_seq:extra\_seq) led to the detection  
328 of the Fyn-SH3 state containing a disordered C-terminus. This might stem from the very low population  
329 of this state even in the triple mutant, which has been measured experimentally as about 2% [39], and/or  
330 from potential biases stemming from training set composition (most SH3 structures in the PDB have  
331 an ordered C-terminus). Additionally, only a handful of predictions were found to be in the alternative  
332 conformation (six in the 8:16 subsampling conditions, from a total of 480 predictions, or 1.25% of  
333 the total), and no significant coverage of intermediate conformations between ordered and disordered  
334 C-terminus was found in any subsampling condition. These results hint at a resolution limitation of  
335 subsampled AF2, which did not perform well at predicting intermediate conformations in this example,  
336 and required extreme subsampling to detect the disordered C-terminus conformation of triple mutant  
337 Fyn-SH3.

338 Next, we repeated our prediction heuristic for wild-type Fyn-SH3, which led to no predictions of  
339 conformations with the disordered C-terminus, regardless of subsampling level (Supplementary Figure  
340 23B). This is not unexpected, as this conformation in wild-type Fyn-SH3 is present in presumably un-  
341 detectable levels (if at all), and the A39V+N53P+V55L mutations are required to stabilize it sufficiently  
342 for detection. Considering the potential resolution limitations described above and the presumably ex-  
343 tremely low population of this conformation in wild-type Fyn-SH3, it is unsurprising that AF2 was not  
344 able to predict it, even with extreme subsampling levels.

## 345 **AlkB**

346 Alkylation B (AlkB) is a bacterial protein that is involved in the adaptive response by reversing alkylation  
347 damage from single-stranded DNA [40]. In solution, AlkB occupies two predominant conformations,  
348 open and closed, with the closed conformation being significantly more stable in the presence of zinc  
349 and of the co-substrate 2OG. [41].

350 Given the presence of two distinct conformational states in AlkB and literature pertaining to their  
351 relative state populations, we sought to measure how our subsampled AF2 approach fared at predicting  
352 the two major states of AlkB in the right proportion. As with the previous examples, we made AlkB  
353 predictions with subsampling conditions ranging from 4:8 to 1024:2048, with 480 individual predictions  
354 per condition (96 seeds time five models). The results of the AlkB predictions with subsampled AF2 are  
355 described in Supplementary Figure 24.

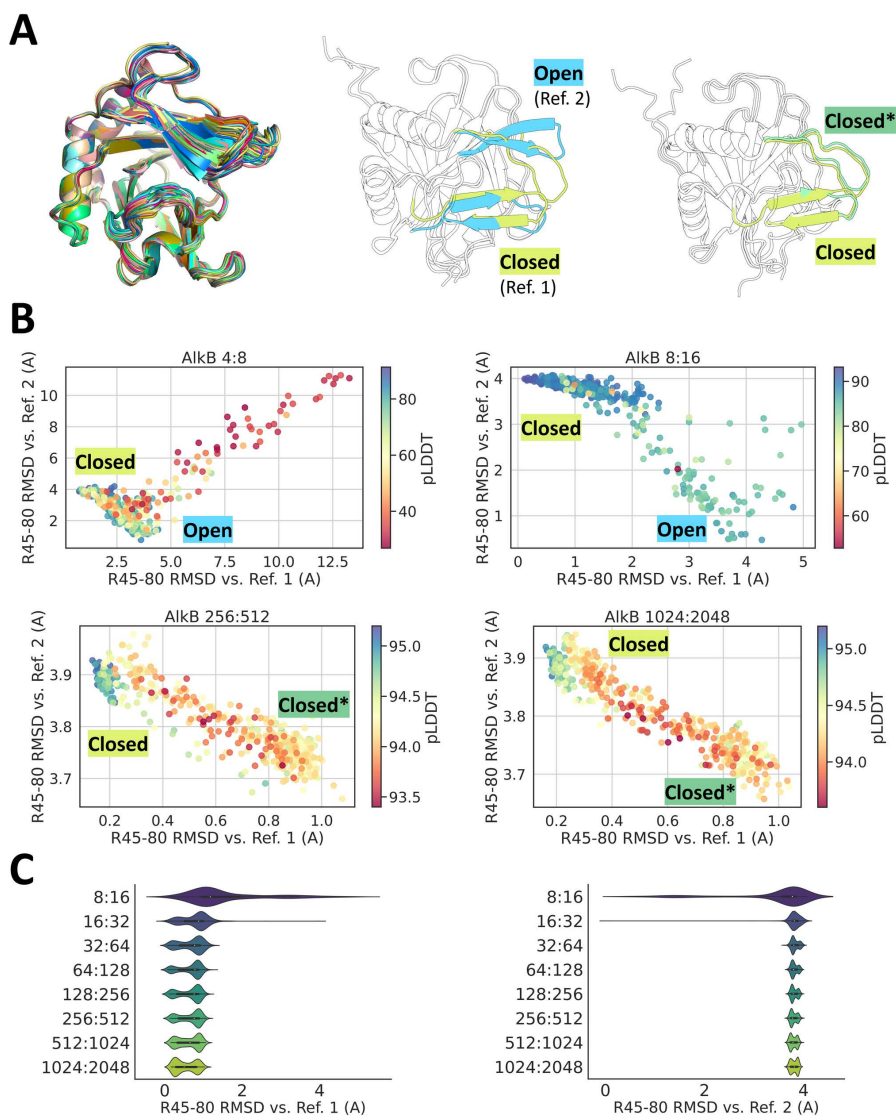

**Supplementary Figure 24:** Predictions for the AlkB system using the subsampled AF2 methodology described in this study. (A) (left) Structural models obtained from the prediction method, aligned to the top-ranked prediction by pLDDT (AF2's confidence metric) and overlaid on top of each other in different colors; (middle) Rendering of the conformational references used to summarize the prediction results in the binding site backbone RMSD vs. references scatterplots. Each structure is colored according to its accompanying label; and (right) Comparison between the closed conformation of AlkB and a slightly open conformation that is predicted frequently with certain subsampling conditions. (B) Bidimensional projection of four sample prediction results, comparing the similarity of each prediction to either Ref. 1 (closed binding site, PDB ID 3I49a) or Ref. 2 (open binding site, AF2 prediction) by a C-terminus backbone RMSD metric. Predictions are colored by average pLDDT, which is a metric of AlphaFold2's confidence in the resulting model. (C) Distribution of binding site backbone RMSD values vs. each reference for each subsampling condition tested (subsampling condition 4:8 omitted from the plot to avoid distortion of the X axis).

356 Importantly, our subsampled AF2 approach correctly captures the open and closed conformations of  
 357 AlkB with certain subsampling conditions such as 8:16, with strong coverage of intermediate confor-

358 mations in the putative transition. The closed conformation is predicted far more frequently than the  
359 open conformation, which is interesting as that conformation only becomes dominant upon the binding  
360 of zinc and of the co-substrate 2OG [40], indicating a potential bias in AF2's predictions that cause the  
361 method to preferentially predict the bound form of the AlkB even in the absence of explicit substrate or  
362 ion coordination. Interestingly and similar to the CCR5 example, reducing subsampling levels leads to a  
363 reduction in conformational diversity, to the point that the proper "open" conformation is not predicted  
364 after max\_seq:extra\_seq values of 16:32. The ensembles resulting from predictions above this threshold  
365 are still strongly bimodal, but the conformational change between the ground state and the alternative  
366 state is very minute, although it is still on the pathway towards the open conformation.

367 Ultimately, our subsampled AF2 approach was successful in predicting both predominant conformations of AlkB, although the proportions of each prediction did not match what is expected in the  
368 literature for the apo form of the enzyme. The observed effect of loss of conformational diversity at  
369 lower subsampling levels is similar to the one observed in the Abl1, and GMCSF examples, highlighting  
370 the importance of choosing appropriate subsampling conditions for predicting the alternative states of a  
371 given system.  
372

### 373 **Aurora Kinase A**

374 Aurora A is a serine/threonine kinase involved in crucial processes during mitosis and meiosis, playing  
375 a central role in cell proliferation [42]. As with Abl1, Src, and other kinases, Aurora A can shift between  
376 active and inactive forms through a conformational change known as the DFG flip pathway [43]. Improper  
377 regulation of Aurora A kinase activity can be remediated with kinase inhibitors, although that can be  
378 challenging without causing off-site effects [44]. To circumvent this problem, inhibitors selective for  
379 Aurora A kinase have been discovered and/or designed, including the inhibitor known as MLN8054 [45,  
380 46].

381 Interestingly, MLN8054 stands out from other kinase inhibitors because it is thought to induce and  
382 bind to the "DFG-up" conformation in Aurora A [47]. Notably, this conformation is theorized to be an  
383 intermediate conformation in the kinase inactivation pathway (DFG flip) that is presumably at too low  
384 occupancy to be detected with NMR methods in other kinases such as Abl1 [1]. Since MLN8054 preferentially binds to the DFG-up conformation, and MLN8054 is highly selective towards Aurora Kinase  
385 A, we hypothesize that the intermediate conformations in the inactivation pathway might be considerably  
386 more stable in Aurora Kinase A, and that our subsampled AF2 approach could detect this change  
387 in stability. This hypothesis is supported by the observation that Imatinib, which binds to the DFG-out  
388 conformation of kinases, is highly selective towards Abl1, which occupies the DFG-out conformation  
389 significantly more often than Src [48], a phenotype that is captured by subsampled AF2.

390 To test if the Aurora A kinase domain occupies intermediate conformations in the inactivation pathway more frequently than other kinases such as Abl1, we applied our subsampled AF2 protocol with the  
391 Aurora A kinase core, using AF2 to make predictions with subsampling parameters ranging from 4:8 to  
392 1024:2048 (max\_seq:extra\_seq), totaling 480 predictions per condition (96 independent seeds times five  
393 models). The results of these predictions are summarized in Supplementary Figure 25.  
394  
395

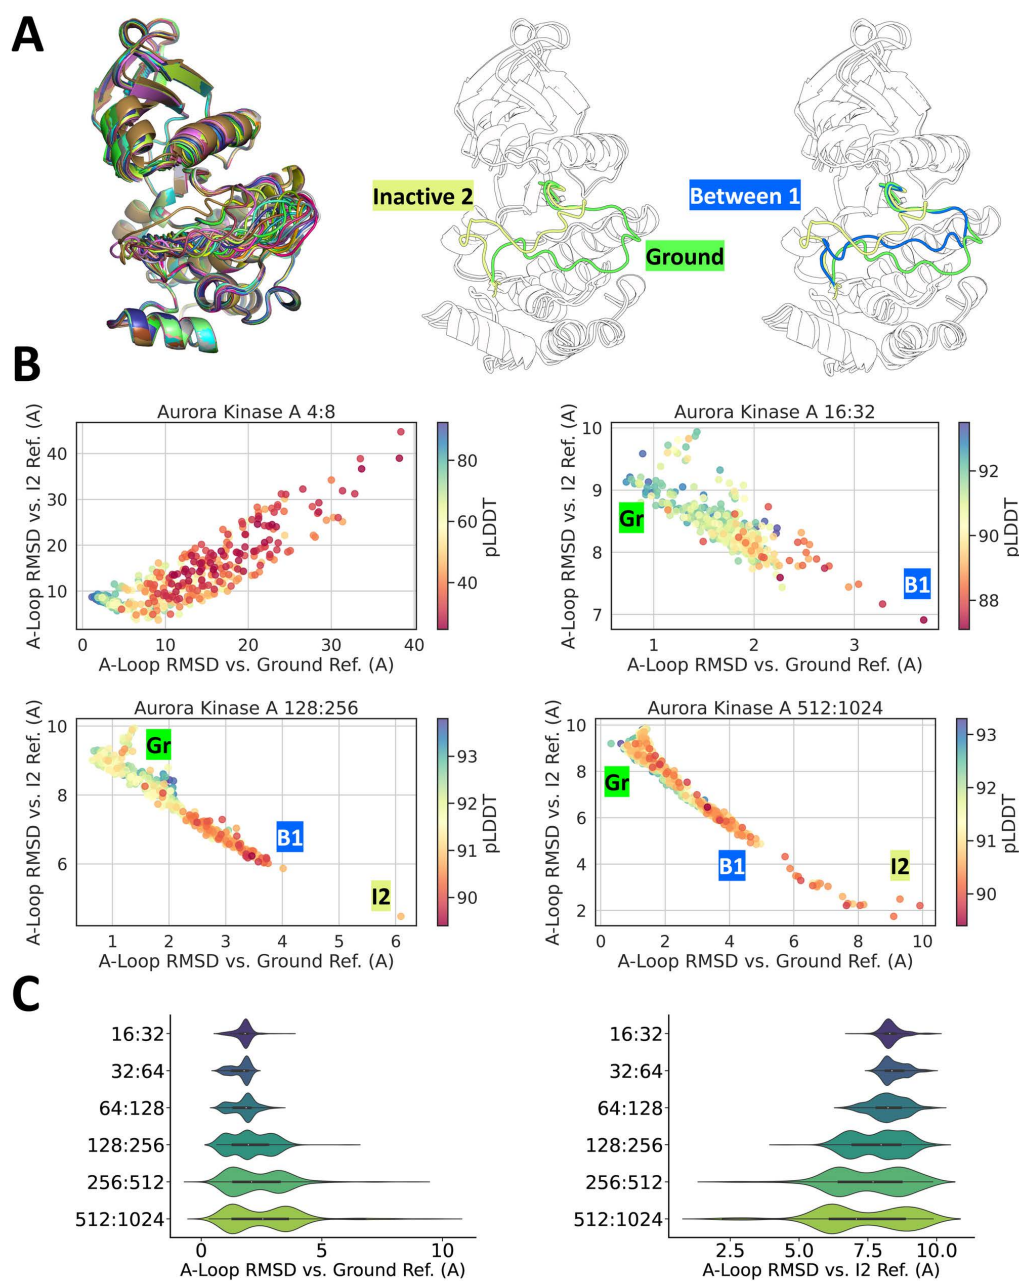

**Supplementary Figure 25:** Predictions for the Aurora Kinase A system using the subsampled AF2 methodology described in this study. (A) (left) Structural models obtained from the prediction method, aligned to the top-ranked prediction by pLDDT (AF2's confidence metric) and overlaid on top of each other in different colors; (middle) Rendering of the conformational references used to summarize the prediction results in the A-Loop backbone RMSD vs. references scatterplots. Each structure is colored according to its accompanying label; and (right) Comparison between the ground-like state, I2-like state, and a putative intermediate conformation that is significantly enriched in the Aurora Kinase A predictions. (B) Bidimensional projection of four sample prediction results, comparing the similarity of each prediction to either Ref. 1 (ground-like) or Ref. 2 (i2-like) by a A-Loop backbone RMSD metric. Predictions are colored by average pLDDT, which is a metric of AlphaFold2's confidence in the resulting model. (C) Distribution of A-Loop backbone RMSD values vs. each reference for each subsampling condition tested (subsampling conditions 4:8 through 8:16 omitted from the plot to avoid distortion of the X axis).

396 Curiously, our Aurora Kinase A prediction ensembles differ from the Abl1 and Src predictions in  
397 that the resulting RMSD distributions vs. known references (Ground or I2) is trimodal in certain sub-  
398 sampling conditions (such as 256:512 or 512:1024), with a putative intermediate conformation being  
399 predicted with similar frequencies than Ground-like conformations. We speculate that the enrichment of  
400 this intermediate conformation in Aurora Kinase A when compared to Abl1 or Src provides support to  
401 the hypothesis that intermediate states might be occupied more frequently in Aurora A.

## 402 **Carbonic Anhydrase**

403 Carbonic Anhydrase (CA) is an enzyme that helps maintain acid-base balance by catalyzing the inter-  
404 conversion between carbon dioxide and water and the dissociated ions of carbonic acid [49, 50]. We  
405 included CA in the analysis because its enzymatic domain is knotted and shows very little conforma-  
406 tional mobility [50, 51], so it is a welcome control case to measure if our subsampled AF2 approach  
407 might be exaggerating the frequency and amplitude of conformational changes in proteins. For this, we  
408 repeated the experimental routine described for all of our previous systems, making predictions for sub-  
409 sampling conditions 4:8 to 1024:2048, with 480 individual predictions for each condition (96 seeds times  
410 five models) for human Carbonic Anhydrase VI [50]. The results for the CA predictions are described in  
411 Supplementary Figure 26.

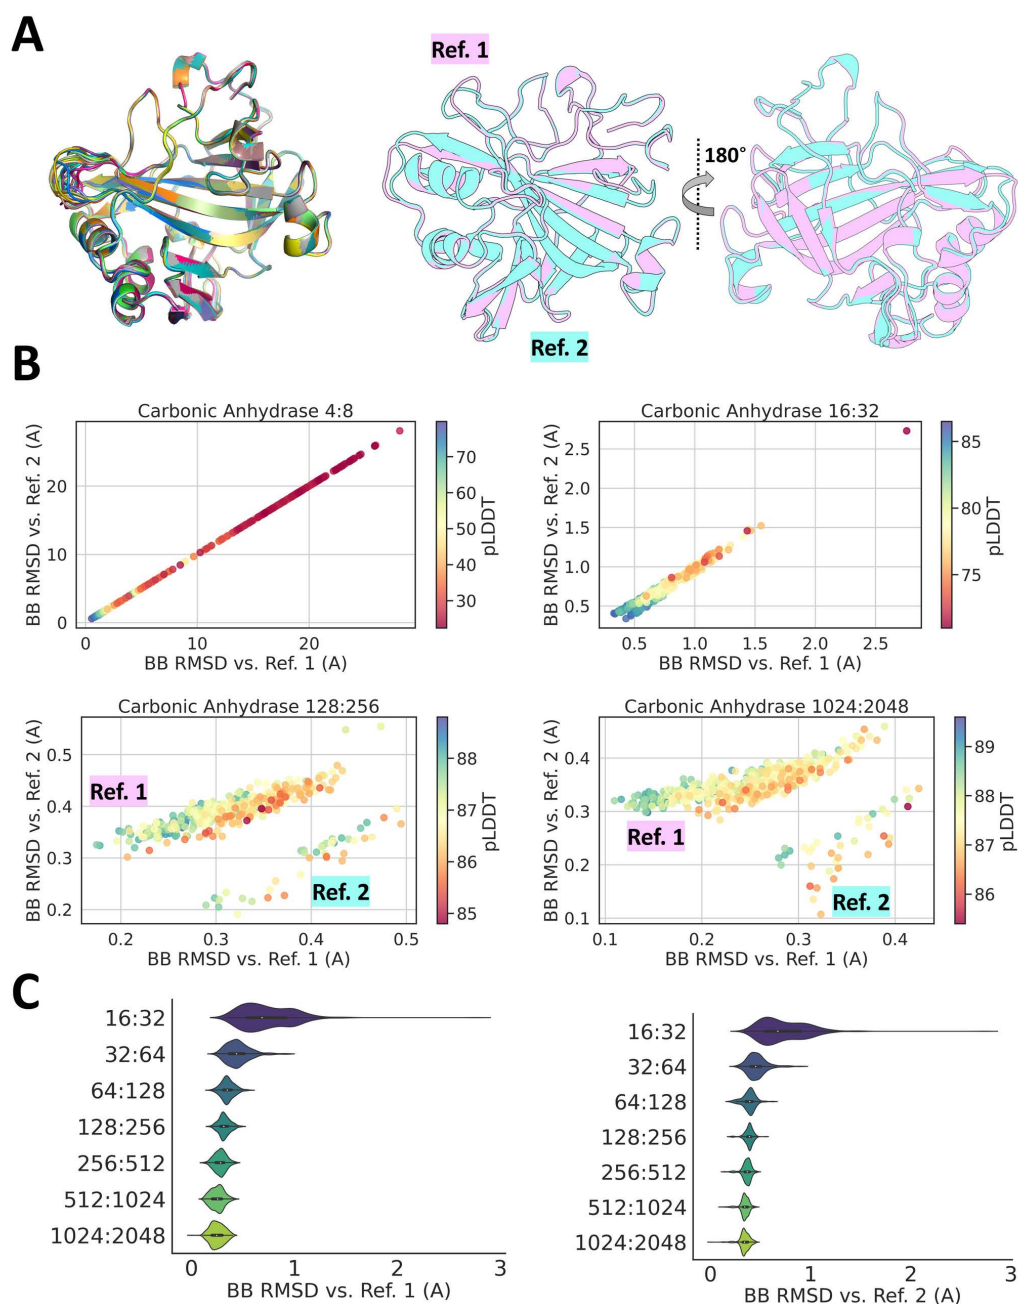

**Supplementary Figure 26:** Predictions for the human Carbonic Anhydrase VI system using the subsampled AF2 methodology described in this study. (A) (left) Structural models obtained from the prediction method, aligned to the top-ranked prediction by pLDDT (AF2's confidence metric) and overlaid on top of each other in different colors; (middle) Rendering of the conformational references used to summarize the predictions in the backbone RMSD vs. reference scatterplots. Each structure is colored according to its accompanying label; and (right) alternate view of the structural references. (B) Bidimensional projection of four sample predictions, comparing the similarity of each prediction to either Ref. 1 (human CA VI, AF2 prediction most similar to PDB ID 3FE4a) or Ref. 2 (bottom-ranked structure by pLDDT) by a backbone RMSD metric. Predictions are colored by average pLDDT, which is a metric of AlphaFold2's confidence in the resulting model. (C) Distribution of backbone RMSD values vs. each reference for each subsampling condition tested (subsampling conditions 4:8 and 8:16 are omitted from the plots to avoid distorting the X axis).

412 Notably, every subsampling condition above 16:32 led to predictions with extremely small confor-  
413 mational diversity for Carbonic Anhydrase, and conditions below that threshold led to predictions of  
414 mostly unfolded/misfolded structures that do not correspond to known conformational states of CA. As  
415 previously mentioned, the amplitude of conformational changes in CA across each predicted ensemble is  
416 minute and mostly provoked by the dynamics of a small flexible loop (residues 116-120) in CA VI. Fur-  
417 ther analysis and comparison with other prediction sets show that other structural elements of Carbonic  
418 Anhydrase, which have no other known conformational states, are very rigid across predictions.

419 These results are not unexpected and highlight the point previously illustrated by the distribution of  
420 RMSD values vs. ground or alternative states in previous examples, which is that subsampled AF2 with  
421 optimized subsampling parameters is correctly predicting conformational changes in domains known to  
422 change conformation or to be flexible, instead of randomly predicting dynamics across protein back-  
423 bones.

424 As a positive control of random predictions of dynamics, we point to extreme subsampling conditions  
425 such as 4:8 in the CA and other examples, where the resulting ensemble is extremely diverse with many  
426 different conformations that are, to the best of our knowledge, not representative of actual states.

## 427 **Additional Negative Controls**

428 In addition to the Carbonic Anhydrase VI test, which is a protein with very little conformational mobility  
429 across most of its backbone, we also sought to test if subsampled AF2 was correctly predicting the rigid-  
430 ity of structural elements known to not be mobile even in proteins that undergo significant conformational  
431 changes.

432 For that test, we measured the backbone RMSD vs. the ground and alternative references from sub-  
433 sampled AF2 prediction ensembles of two structural elements known to be relatively immobile belonging  
434 to either the Abl1 kinase core or the AlkB enzyme. For the Abl1 kinase core, we chose residue range  
435 419-434, as that forms a structural helix in the C-lobe that is seldom disrupted and not involved in the  
436 activation/inactivation pathway. For the AlkB test case, we chose the residue range 150-200, which  
437 forms half of the beta-sandwich in AlkB and is known to be stable and not involved in AlkB opening and  
438 closing. The results of this analysis, as well as comparisons with bona fide structural changes observed  
439 in other structural elements of these example proteins, are summarized in Supplementary Figure 27.

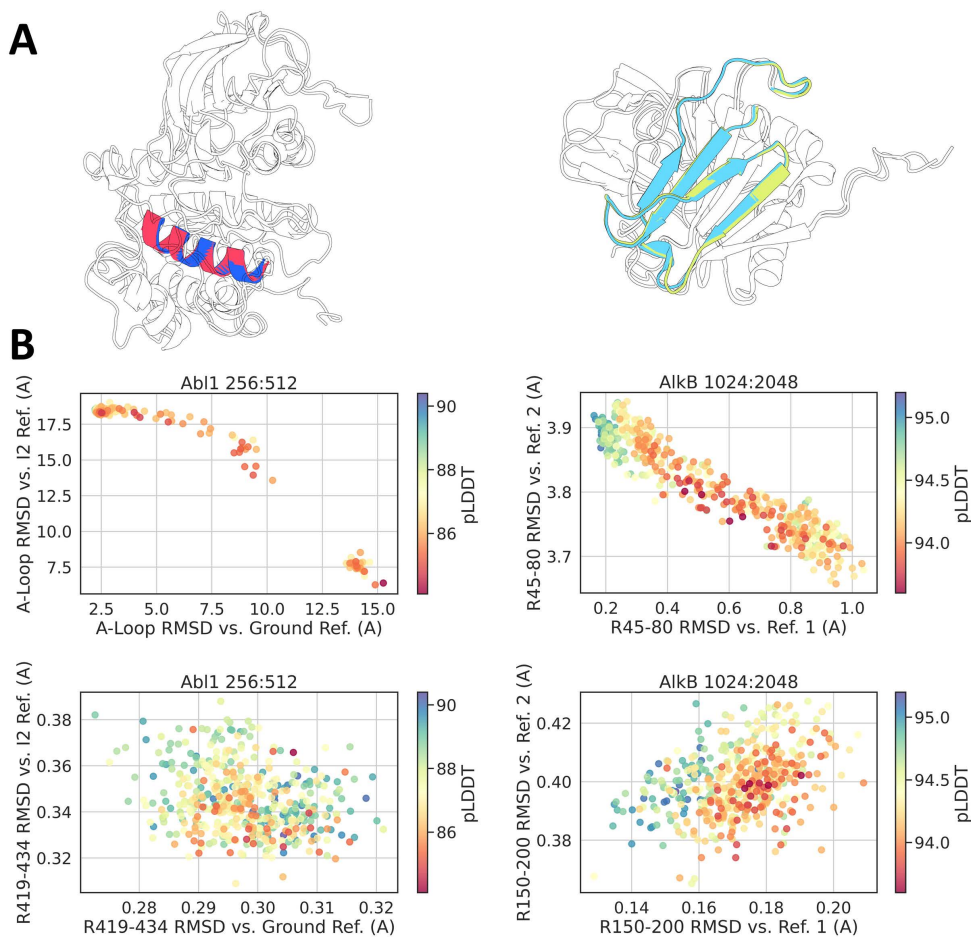

**Supplementary Figure 27:** Comparison of prediction results using subsampled AF2 for mobile and rigid structural elements of the Abl1 kinase core and of AlkB. (A) (left) Superposition of structural models of the Abl1 kinase core in the active or inactive conformations with residue range 419-434 colored in red in the active core, and in blue in the inactive core, (right) Superposition of structural models of the AlkB enzyme in the closed or open conformations with residue range 150-200 colored in yellow in the closed state, and in cyan in the open state (B) (left) Bidimensional projection of results from the Abl1 kinase core prediction ensemble with 256:512 subsampling parameters, comparing the backbone RMSD distribution vs. the inactive and vs. the active references for the mobile activation loop (top) or for the rigid helix formed by residues 419-434 (bottom); (right) Bidimensional projection of results from the AlkB prediction ensemble with 1024:2048 subsampling parameters, comparing the backbone RMSD distribution vs. the closed and vs. the open references for the mobile binding site (top) or for the rigid beta sheets formed by residues 150-200 (bottom).

440 Notably, within both prediction ensembles, the backbone RMSD vs. references for the rigid elements  
 441 did not cross the 0.5 Å threshold, as opposed to the known mobile elements that ranged up to 15 Å  
 442 in the case of Abl1. Additionally, the distribution of RMSDs for the rigid elements did not follow  
 443 either the signature downwards diagonal (strong negative correlation) observed in predictions covering  
 444 a conformational change, or the upwards diagonal (strong positive correlation) observed in predictions  
 445 that diverge significantly from both references. Combined, these results suggest that AF2 is correctly  
 446 predicting rigid structural elements to be rigid and mobile structural elements to be mobile in Abl1 and  
 447 AlkB in the tested subsampling conditions.



## 448 Statistics of Measurements

449 In order to measure the significance of the differences observed in structural ensembles for the multiple  
 450 wild-type vs. variants predictions generated in this study, we used a Kruskal-Wallis H-test between each  
 451 Wild-Type/variant pair. A sample of the results of this analysis are summarized in Supplementary Table  
 452 4. Complete results are available in the GitHub repository used for data deposition in this study [52].

| p_value    | h_stat      | trial                  | test                     | sample_size |
|------------|-------------|------------------------|--------------------------|-------------|
| 1          | 0           | GMCSF                  | R80-90 BB. RMSD vs. Ref. | 480         |
| 2.99E-26   | 112.3543    | GMCSF H15Y             | R80-90 BB. RMSD vs. Ref. | 480         |
| 4.18E-47   | 207.7826    | GMCSF H15R             | R80-90 BB. RMSD vs. Ref. | 480         |
| 7.70E-27   | 115.0427    | GMCSF H15N             | R80-90 BB. RMSD vs. Ref. | 480         |
| 1          | 0           | Calmodulin             | BB. RMSD vs. Ref.        | 480         |
| 8.78E-78   | 348.5452239 | Calmodulin E84K        | BB. RMSD vs. Ref.        | 480         |
| 1.63E-09   | 36.36993935 | Calmodulin M124L       | BB. RMSD vs. Ref.        | 480         |
| 1          | 0           | Fyn SH3                | C-Term, RMSD vs. Ref.    | 480         |
| 4.72E-22   | 93.20141568 | Fyn SH3 A39V/N53P/V55L | C-Term. RMSD vs. Ref.    | 480         |
| 1          | 0           | Abl1                   | A-Loop RMSD vs. Ref.     | 480         |
| 1.66E-12   | 49.84482421 | Anc-AS                 | A-Loop RMSD vs. Ref.     | 480         |
| 1.88E-17   | 72.26142001 | Src                    | A-Loop RMSD vs. Ref.     | 480         |
| 1.18E-11   | 46.00662103 | Abl1 M290L + L301I     | A-Loop RMSD vs. Ref.     | 480         |
| 0.34444905 | 0.893802102 | Abl1 E255V + T315I     | A-Loop RMSD vs. Ref.     | 480         |

453 Notably, most variants led to distributions of structural observables that are significantly different than  
 454 the wild-type measurements, with the exception of a few Abl1 activating mutations for which statistical  
 455 power was reduced.

## 456 Supplementary References

- 457 1. Xie, T., Saleh, T., Rossi, P. & Kalodimos, C. G. Conformational states dynamically populated by a  
 458 kinase determine its function. *Science* **370** (Oct. 2020).
- 459 2. Finn, R. D., Clements, J. & Eddy, S. R. HMMER web server: interactive sequence similarity search-  
 460 ing. *Nucleic Acids Research* **39**, W29–W37 (May 2011).
- 461 3. Suzek, B. E., Wang, Y., Huang, H., McGarvey, P. B. & and, C. H. W. UniRef clusters: a com-  
 462 prehensive and scalable alternative for improving sequence similarity searches. *Bioinformatics* **31**,  
 463 926–932 (Nov. 2014).
- 464 4. Steinegger, M. & Söding, J. Clustering huge protein sequence sets in linear time. *Nature Commu-  
 465 nications* **9** (June 2018).
- 466 5. Richardson, L. *et al.* MGnify: the microbiome sequence data analysis resource in 2023. *Nucleic  
 467 Acids Research* **51**, D753–D759 (Dec. 2022).
- 468 6. Eastman, P. *et al.* OpenMM 7: Rapid development of high performance algorithms for molecular  
 469 dynamics. *PLOS Computational Biology* **13** (ed Gentleman, R.) e1005659 (July 2017).
- 470 7. Lindorff-Larsen, K. *et al.* Improved side-chain torsion potentials for the Amber ff99SB protein  
 471 force field. *Proteins: Structure, Function, and Bioinformatics* **78**, 1950–1958 (Mar. 2010).

- 472 8. Mark, P. & Nilsson, L. Structure and Dynamics of the TIP3P, SPC, and SPC/E Water Models at  
473 298 K. *The Journal of Physical Chemistry A* **105**, 9954–9960 (Oct. 2001).
- 474 9. Hess, B., Bekker, H., Berendsen, H. J. C. & Fraaije, J. G. E. M. LINCS: A linear constraint solver  
475 for molecular simulations. *Journal of Computational Chemistry* **18**, 1463–1472 (Sept. 1997).
- 476 10. Bogetti, A. T. *et al.* A Suite of Advanced Tutorials for the WESTPA 2.0 Rare-Events Sampling  
477 Software [Article v2.0]. *Living Journal of Computational Molecular Science* **5** (2022).
- 478 11. Service, R. ‘The game has changed.’ AI triumphs at solving protein structures. *Science* (Nov. 2020).
- 479 12. Roney, J. P. & Ovchinnikov, S. State-of-the-Art Estimation of Protein Model Accuracy Using Al-  
480 phaFold. *Physical Review Letters* **129** (Nov. 2022).
- 481 13. Walter, M. R. *et al.* Three-dimensional structure of recombinant human granulocyte-macrophage  
482 colony-stimulating factor. *Journal of Molecular Biology* **224**, 1075–1085 (Apr. 1992).
- 483 14. Del Alamo, D., Sala, D., Mchaourab, H. S. & Meiler, J. Sampling alternative conformational states  
484 of transporters and receptors with AlphaFold2. *eLife* **11** (eds Robertson, J. L., Swartz, K. J. &  
485 Robertson, J. L.) Publisher: eLife Sciences Publications, Ltd, e75751 (Mar. 2022).
- 486 15. Jiao, X. *et al.* Recent Advances Targeting CCR5 for Cancer and Its Role in Immuno-Oncology.  
487 *Cancer Research* **79**, 4801–4807 (Oct. 2019).
- 488 16. Zhang, H. *et al.* Structural basis for chemokine recognition and receptor activation of chemokine  
489 receptor CCR5. *Nature Communications* **12** (July 2021).
- 490 17. Lee, S. *et al.* Petascale Homology Search for Structure Prediction (July 2023).
- 491 18. Boudker, O. & Verdon, G. Structural perspectives on secondary active transporters. *Trends in Phar-  
492 macological Sciences* **31**, 418–426 (Sept. 2010).
- 493 19. Masureel, M. *et al.* Protonation drives the conformational switch in the multidrug transporter LmrP.  
494 *Nature Chemical Biology* **10**, 149–155 (Dec. 2013).
- 495 20. Del Alamo, D., Govaerts, C. & Mchaourab, H. S. AlphaFold2 predicts the inward-facing confor-  
496 mation of the multidrug transporter LmrP. *Proteins: Structure, Function, and Bioinformatics* **89**,  
497 1226–1228 (May 2021).
- 498 21. Debruycker, V. *et al.* An embedded lipid in the multidrug transporter LmrP suggests a mechanism  
499 for polyspecificity. *Nature Structural Molecular Biology* **27**, 829–835 (July 2020).
- 500 22. Steinegger, M. & Söding, J. MMseqs2 enables sensitive protein sequence searching for the analysis  
501 of massive data sets. *Nature Biotechnology* **35**, 1026–1028 (Oct. 2017).
- 502 23. Yan, R. *et al.* Mechanism of substrate transport and inhibition of the human LAT1-4F2hc amino  
503 acid transporter. *Cell Discovery* **7** (Mar. 2021).
- 504 24. Chin, D. & Means, A. R. Calmodulin: a prototypical calcium sensor. en. *Trends Cell Biol.* **10**, 322–  
505 328 (Aug. 2000).
- 506 25. Kuboniwa, H. *et al.* Solution structure of calcium-free calmodulin. en. *Nat. Struct. Mol. Biol.* **2**,  
507 768–776 (Sept. 1995).
- 508 26. Houdusse, A., Love, M. L., Dominguez, R., Grabarek, Z. & Cohen, C. Structures of four Ca<sup>2+</sup>-  
509 bound troponin C at 2.0 Å resolution: further insights into the Ca<sup>2+</sup>-switch in the calmodulin  
510 superfamily. en. *Structure* **5**, 1695–1711 (Dec. 1997).
- 511 27. Zhang, M., Tanaka, T. & Ikura, M. Calcium-induced conformational transition revealed by the  
512 solution structure of apo calmodulin. en. *Nat. Struct. Mol. Biol.* **2**, 758–767 (Sept. 1995).

- 513 28. Kataoka, M., Persechini, A., Tokunaga, F. & Kretsinger, R. H. The linker of calmodulin lacking  
514 Glu84 is elongated in solution, although it is bent in the crystal. en. *Proteins* **25**, 335–341 (July  
515 1996).
- 516 29. Igumenova, T. I., Lee, A. L. & Wand, A. J. Backbone and side chain dynamics of mutant calmodulin-  
517 peptide complexes. en. *Biochemistry* **44**, 12627–12639 (Sept. 2005).
- 518 30. Aykut, A. O., Atilgan, A. R. & Atilgan, C. Designing Molecular Dynamics Simulations to Shift  
519 Populations of the Conformational States of Calmodulin. *PLoS Computational Biology* **9** (ed Livesay,  
520 D. R.) e1003366 (Dec. 2013).
- 521 31. Pawson, T. & Schlessingert, J. SH2 and SH3 domains. *Current Biology* **3**, 434–442 (July 1993).
- 522 32. Musacchio, A., Gibson, T., Lehto, V.-P. & Saraste, M. SH3 — an abundant protein domain in search  
523 of a function. *FEBS Letters* **307**, 55–61 (July 1992).
- 524 33. Huse, M. & Kuriyan, J. The Conformational Plasticity of Protein Kinases. *Cell* **109**, 275–282 (May  
525 2002).
- 526 34. Solheim, S. A. *et al.* Interactions between the Fyn SH3-domain and adaptor protein Cbp/PAG  
527 derived ligands, effects on kinase activity and affinity. *The FEBS Journal* **275**, 4863–4874 (Sept.  
528 2008).
- 529 35. Matsumura, Y. *et al.* Transient Helical Structure during PI3K and Fyn SH3 Domain Folding. *The*  
530 *Journal of Physical Chemistry B* **117**, 4836–4843 (Apr. 2013).
- 531 36. Neudecker, P. *et al.* Identification of a Collapsed Intermediate with Non-native Long-range Interac-  
532 tions on the Folding Pathway of a Pair of Fyn SH3 Domain Mutants by NMR Relaxation Dispersion  
533 Spectroscopy. *Journal of Molecular Biology* **363**, 958–976 (Nov. 2006).
- 534 37. Chu, W.-T., Zhang, J.-L., Zheng, Q.-C., Chen, L. & Zhang, H.-X. Insights into the Folding and  
535 Unfolding Processes of Wild-Type and Mutated SH3 Domain by Molecular Dynamics and Replica  
536 Exchange Molecular Dynamics Simulations. *PLoS ONE* **8** (ed Ventura, S.) e64886 (May 2013).
- 537 38. Ollerenshaw, J. E., Kaya, H., Chan, H. S. & Kay, L. E. Sparsely populated folding intermediates of  
538 the Fyn SH3 domain: Matching native-centric essential dynamics and experiment. *Proceedings of*  
539 *the National Academy of Sciences* **101**, 14748–14753 (Oct. 2004).
- 540 39. Neudecker, P. *et al.* Structure of an Intermediate State in Protein Folding and Aggregation. *Science*  
541 **336**, 362–366 (Apr. 2012).
- 542 40. Yu, B. & Hunt, J. F. Enzymological and structural studies of the mechanism of promiscuous sub-  
543 strate recognition by the oxidative DNA repair enzyme AlkB. *Proceedings of the National Academy*  
544 *of Sciences* **106**, 14315–14320 (Aug. 2009).
- 545 41. Ergel, B. *et al.* Protein Dynamics Control the Progression and Efficiency of the Catalytic Reaction  
546 Cycle of the Escherichia coli DNA-Repair Enzyme AlkB. *Journal of Biological Chemistry* **289**,  
547 29584–29601 (Oct. 2014).
- 548 42. Carvajal, R. D., Tse, A. & Schwartz, G. K. Aurora Kinases: New Targets for Cancer Therapy.  
549 *Clinical Cancer Research* **12**, 6869–6875 (Dec. 2006).
- 550 43. Pitsawong, W. *et al.* Dynamics of human protein kinase Aurora A linked to drug selectivity. *eLife*  
551 **7** (June 2018).
- 552 44. Bavetsias, V. & Linardopoulos, S. Aurora Kinase Inhibitors: Current Status and Outlook. *Frontiers*  
553 *in Oncology* **5** (Dec. 2015).

- 554 45. Sells, T. B. *et al.* MLN8054 and Alisertib (MLN8237): Discovery of Selective Oral Aurora A  
555 Inhibitors. *ACS Medicinal Chemistry Letters* **6**, 630–634 (May 2015).
- 556 46. Sloane, D. A. *et al.* Drug-Resistant Aurora A Mutants for Cellular Target Validation of the Small  
557 Molecule Kinase Inhibitors MLN8054 and MLN8237. *ACS Chemical Biology* **5**, 563–576 (May  
558 2010).
- 559 47. Yang, Y. *et al.* Molecular dynamics and free energy studies on Aurora kinase A and its mutant  
560 bound with MLN8054: insight into molecular mechanism of subtype selectivity. *Molecular BioSys-*  
561 *tems* **8**, 3049 (2012).
- 562 48. Wilson, C. *et al.* Using ancient protein kinases to unravel a modern cancer drug’s mechanism.  
563 *Science* **347**, 882–886 (Feb. 2015).
- 564 49. Occhipinti & Boron. Role of Carbonic Anhydrases and Inhibitors in Acid–Base Physiology: In-  
565 sights from Mathematical Modeling. *International Journal of Molecular Sciences* **20**, 3841 (Aug.  
566 2019).
- 567 50. Pilka, E. S., Kochan, G., Oppermann, U. & Yue, W. W. Crystal structure of the secretory isozyme  
568 of mammalian carbonic anhydrases CA VI: Implications for biological assembly and inhibitor  
569 development. *Biochemical and Biophysical Research Communications* **419**, 485–489 (Mar. 2012).
- 570 51. Dzubiella, J. Tightening and Untying the Knot in Human Carbonic Anhydrase III. *The Journal of*  
571 *Physical Chemistry Letters* **4**, 1829–1833 (May 2013).
- 572 52. Da Silva, G. M., Cui, J. Y., Dalgarno, D. C., Lisi, G. P. & Rubenstein, B. M. High-throughput pre-  
573 diction of protein conformational distributions with subsampled AlphaFold2. *gms\_natcomms\_1705932980\_data*  
574 (2024).
